# Supplementary material for: Introducing 3D conjugated acceptors with intense red absorption: homoleptic metal(ii) complexes of di(phenylacetylene) azadipyrromethene
Source: Royal Society of Chemistry journal article supplement (doi:10.1039/c3tc31377h), 2013-01-01
Supplement: c3tc31377h.pdf [file c3tc31377h.pdf]

## Supporting Information

# Introducing 3D conjugated acceptors with intense red absorption: homoleptic metal (II) complexes of di(phenylacetylene) azadipyrromethene

Wasana Senevirathna, Geneviève Sauvé\*

Department of Chemistry, Case Western Reserve University, Cleveland, Ohio 44106

Cleveland, Ohio 44106

Email: [genevieve.sauve@case.edu](mailto:genevieve.sauve@case.edu)

### Table of Contents

|                                               | Page |
|-----------------------------------------------|------|
| NMR spectra                                   | S2   |
| MALDI-TOF-MS spectra                          | S5   |
| TGA graphs                                    | S8   |
| Optical properties                            | S9   |
| Cyclic voltammetry graphs                     | S10  |
| P3HT Fluorescence quenching graphs            | S11  |
| Computational details                         | S23  |
| Cartesian coordinates of optimized geometries | S29  |

### NMR spectra for WS1 series

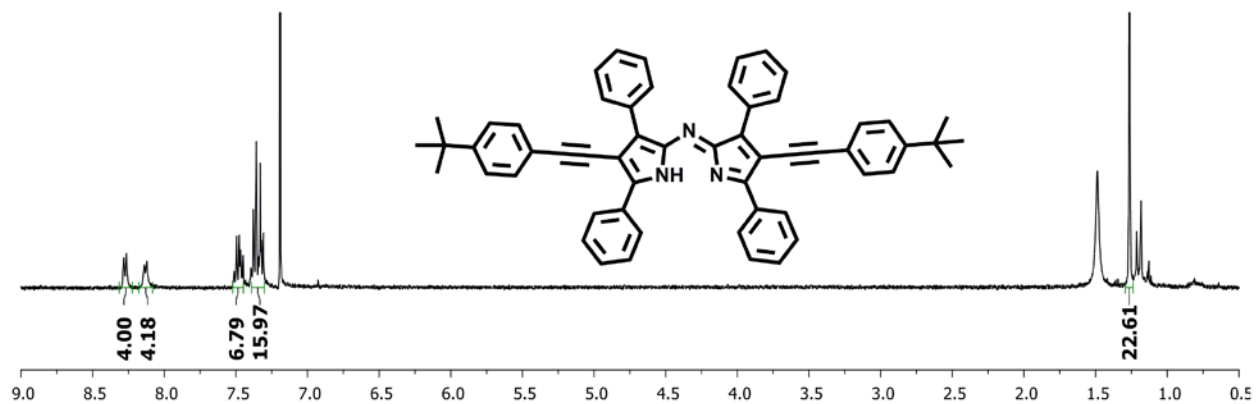

Figure S1: 400 MHz <sup>1</sup>H NMR of WS1.

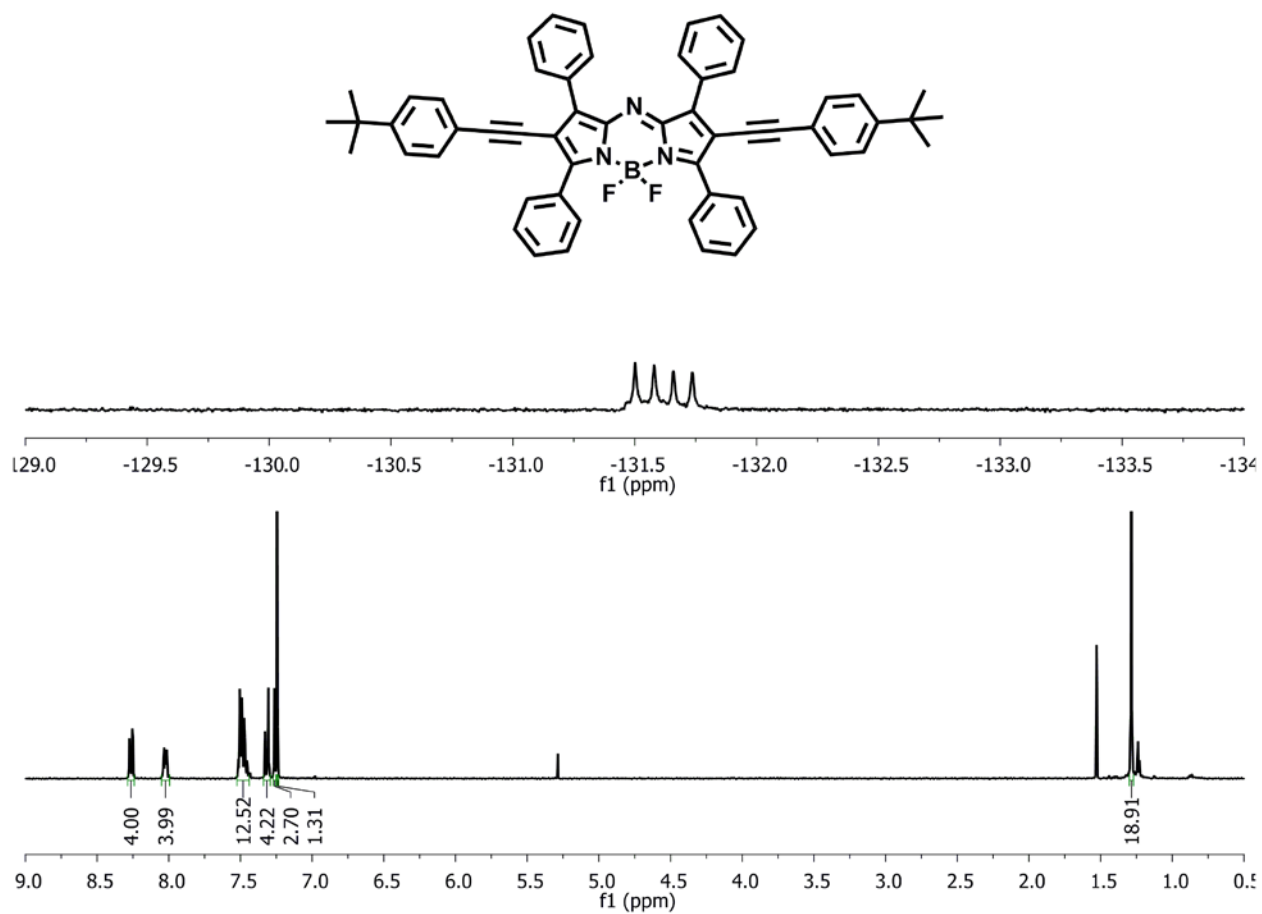

Figure S2: 400 MHz <sup>1</sup>H NMR (bottom) and <sup>19</sup>F NMR (top) of WS1BF<sub>2</sub>.

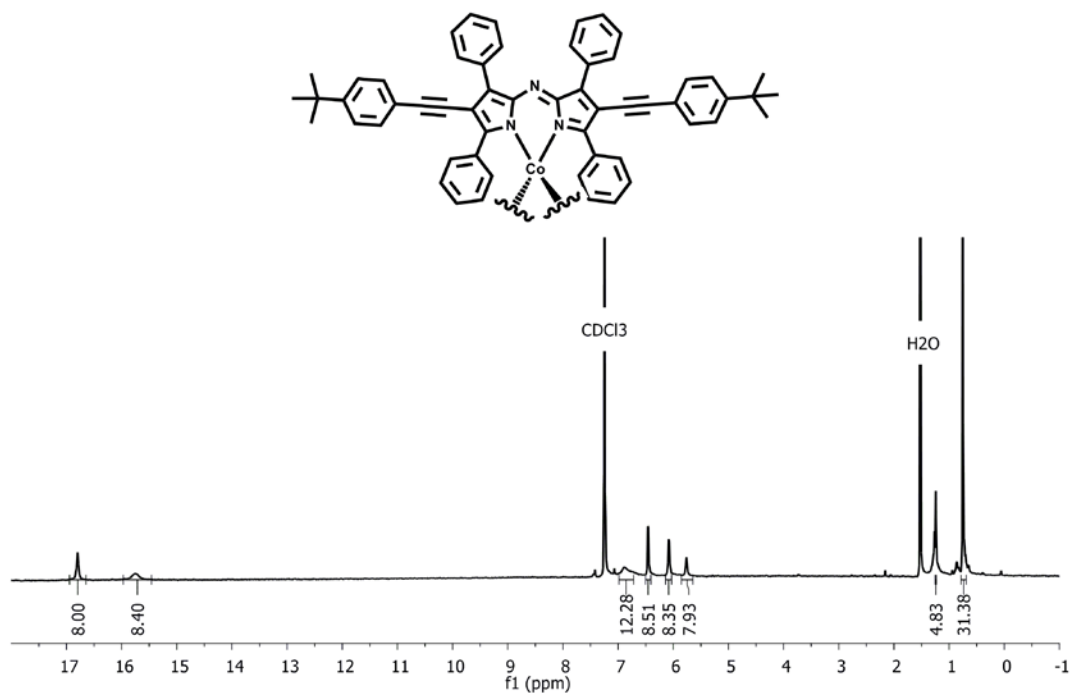

Figure S3: 400 MHz  $^1H$  NMR of  $WS_{12}Co$

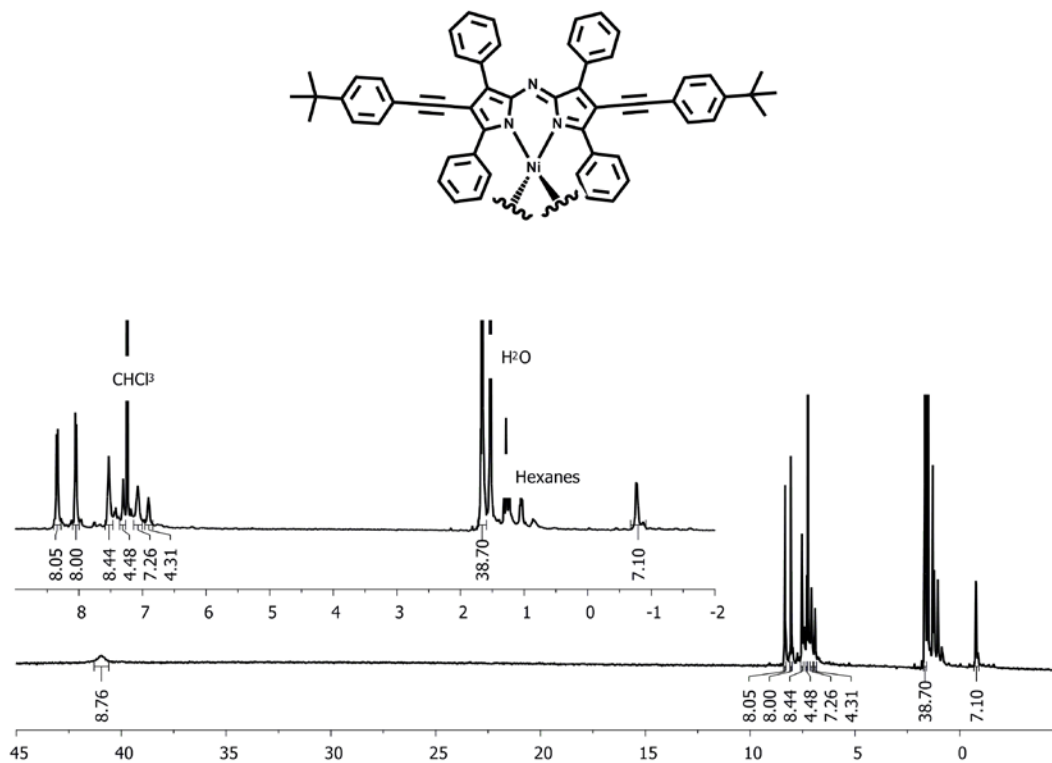

Figure S4: 400 MHz  $^1H$  NMR of  $WS_{12}Ni$ . Inset shows an expansion between -2 to 9 ppm.

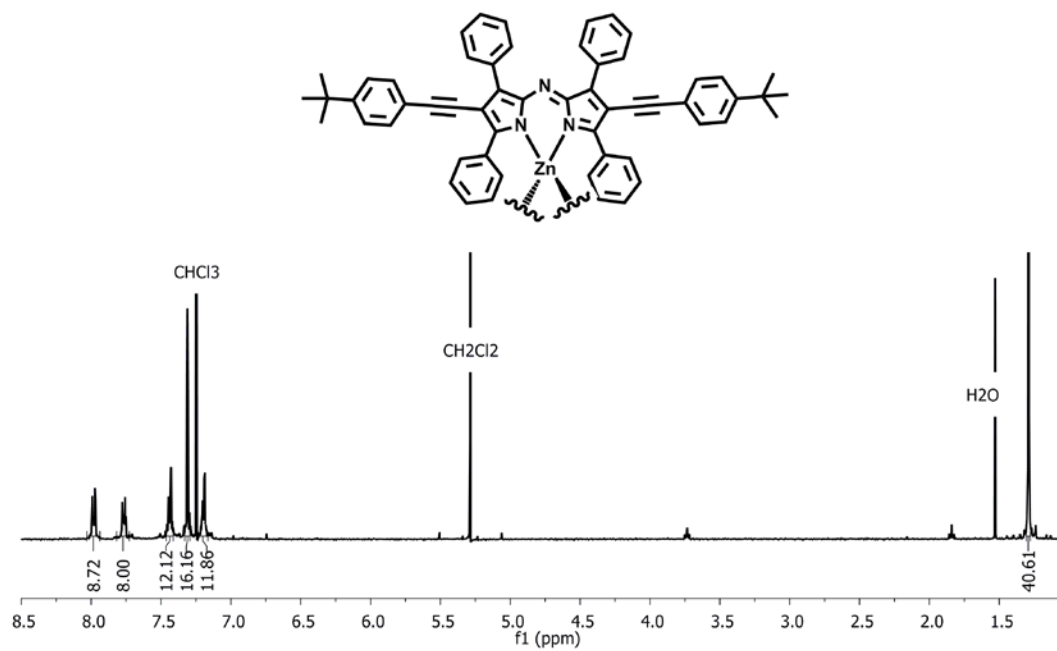

Figure S5: 400 MHz <sup>1</sup>H NMR of WS<sub>12</sub>Zn.

### MALDI-TOF-MS spectra for WS1 series

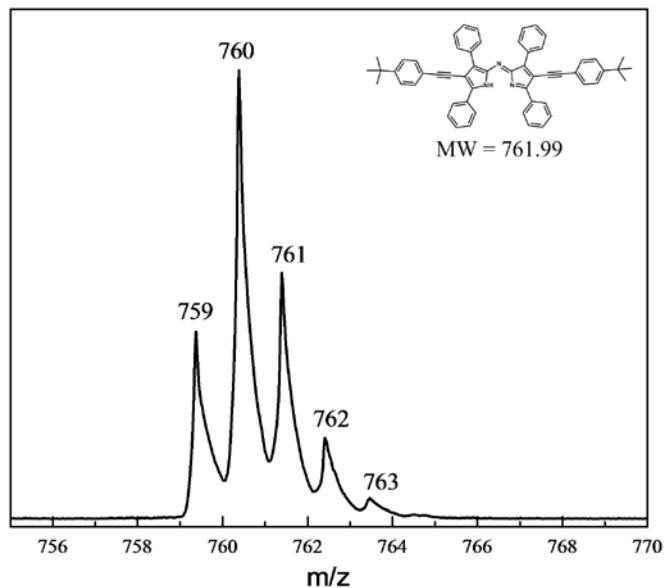

Figure S6: MALDI-TOF Mass Spectrum of WS1 (Isotope pattern of the molecular ion in reflective negative mode).

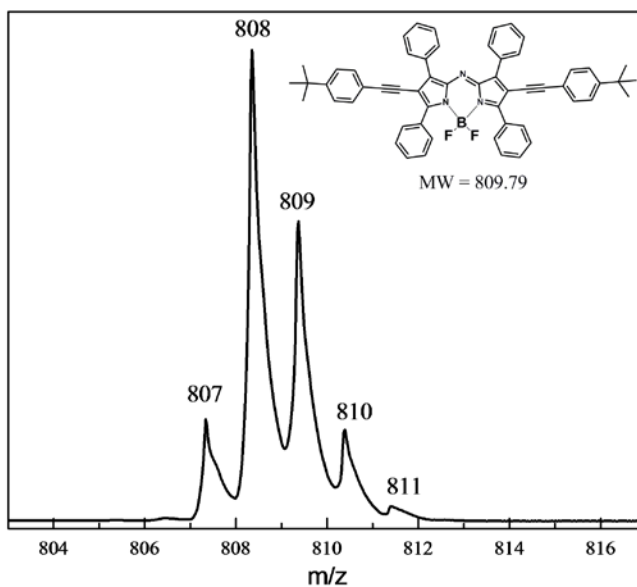

Figure S7: MALDI-TOF Mass Spectrum of WS1BF<sub>2</sub> (Isotope pattern of the molecular ion in reflective negative mode).

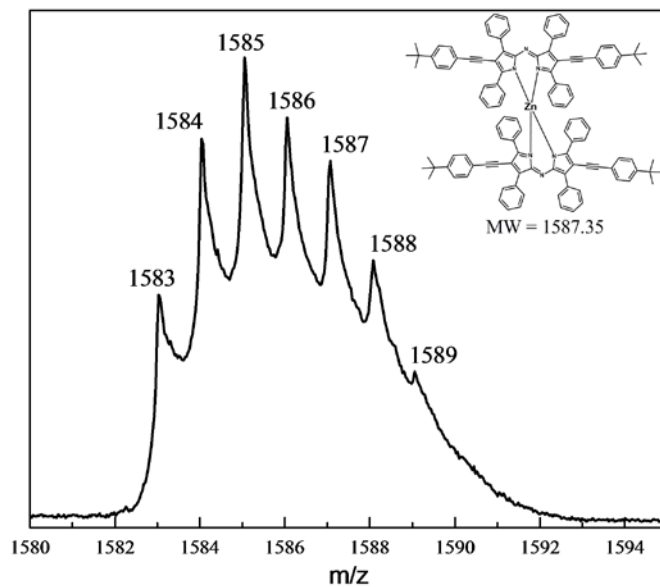

Figure S8: MALDI-TOF Mass Spectrum of WS<sub>12</sub>Zn (Isotope pattern of the molecular ion in reflective negative mode).

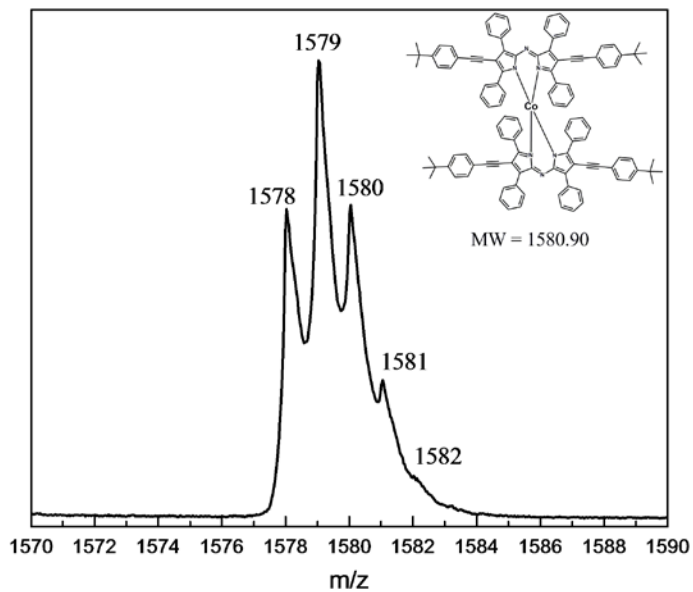

Figure S9: MALDI-TOF Mass Spectrum of WS<sub>12</sub>Co (Isotope pattern of the molecular ion in reflective negative mode).

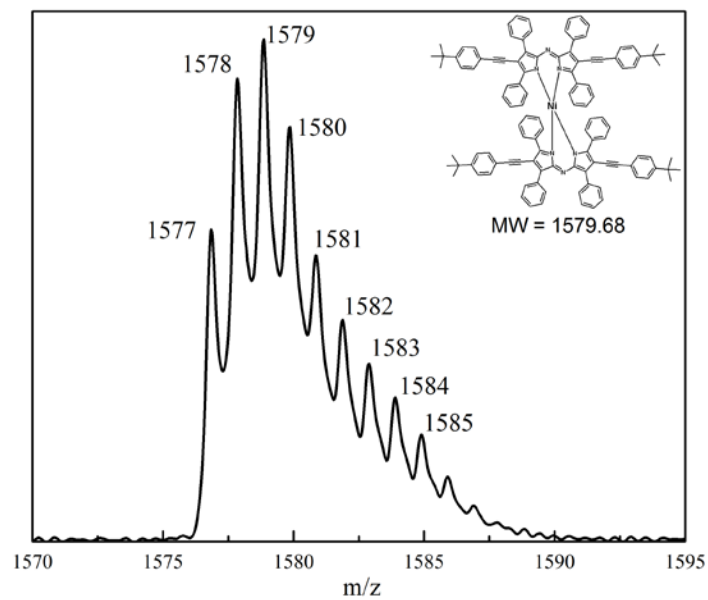

Figure S10: MALDI-TOF Mass Spectrum of WS<sub>12</sub>Ni (Isotope pattern of the molecular ion in reflective negative mode).

### Thermal gravimetric graphs for ADP and WS1 series

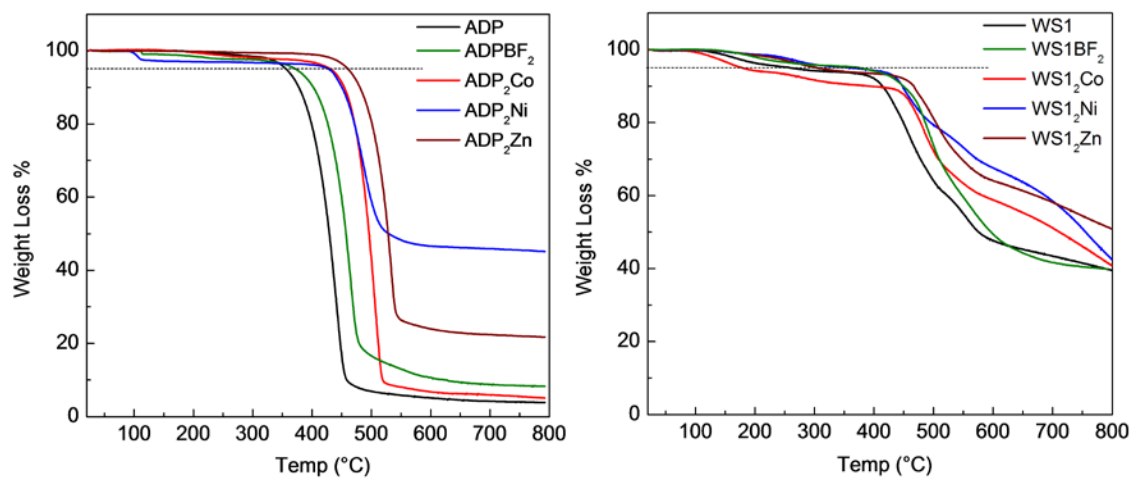

Figure S11: TGA graphs of ADP and WS1 series

Table S1: Decomposition temperature (°C) at 5% weight loss

|                 | <b>ADP</b> | <b>WS1</b> |
|-----------------|------------|------------|
| H               | 356        | 280        |
| BF <sub>2</sub> | 372        | 375        |
| Co              | 431        | 240        |
| Ni              | 428        | 360        |
| Zn              | 461        | 304        |



## Optical properties

Table S2: Optical properties

| Compound            | $\lambda_{\text{max near-UV, nm}}$<br>( $\epsilon, \times 10^3 \text{ M}^{-1} \text{ cm}^{-1}$ ) | $\lambda_{\text{max red, nm}}$<br>( $\epsilon, \times 10^3 \text{ M}^{-1} \text{ cm}^{-1}$ ) | $\lambda_{\text{max red-shoulder, nm}}$<br>( $\epsilon, \times 10^3 \text{ M}^{-1} \text{ cm}^{-1}$ ) | $\lambda_{\text{onsets, nm}}$ | $E_{\text{gap, eV}}$ |
|---------------------|--------------------------------------------------------------------------------------------------|----------------------------------------------------------------------------------------------|-------------------------------------------------------------------------------------------------------|-------------------------------|----------------------|
| ADP                 | 302 (38)                                                                                         | 596 (42)                                                                                     |                                                                                                       | 645                           | 1.92                 |
| WS1                 | 302 (46)                                                                                         | 625 (47)                                                                                     |                                                                                                       | 715                           | 1.73                 |
| ADPBF <sub>2</sub>  | 310 (20)                                                                                         | 649 (50)                                                                                     |                                                                                                       | 688                           | 1.80                 |
| WS1BF <sub>2</sub>  | 307 (32)                                                                                         | 741 (48)                                                                                     |                                                                                                       | 798                           | 1.55                 |
| ADP <sub>2</sub> Co | 304 (56)                                                                                         | 599 (61)                                                                                     | 634 (37)                                                                                              | 730                           | 1.70                 |
| WS1 <sub>2</sub> Co | 315 (80)                                                                                         | 670 (73)                                                                                     | 703 (73)                                                                                              | 793                           | 1.56                 |
| ADP <sub>2</sub> Ni | 304 (52)                                                                                         | 603 (50)                                                                                     | 650 (45)                                                                                              | 734                           | 1.69                 |
| WS1 <sub>2</sub> Ni | 302 (80)                                                                                         | 683 (67)                                                                                     | 710 (68)                                                                                              | 805                           | 1.54                 |
| ADP <sub>2</sub> Zn | 302 (57)                                                                                         | 591 (78)                                                                                     | 645 (51)                                                                                              | 713                           | 1.74                 |
| WS1 <sub>2</sub> Zn | 300 (82)                                                                                         | 650 (91)                                                                                     | 683 (94)                                                                                              | 764                           | 1.62                 |

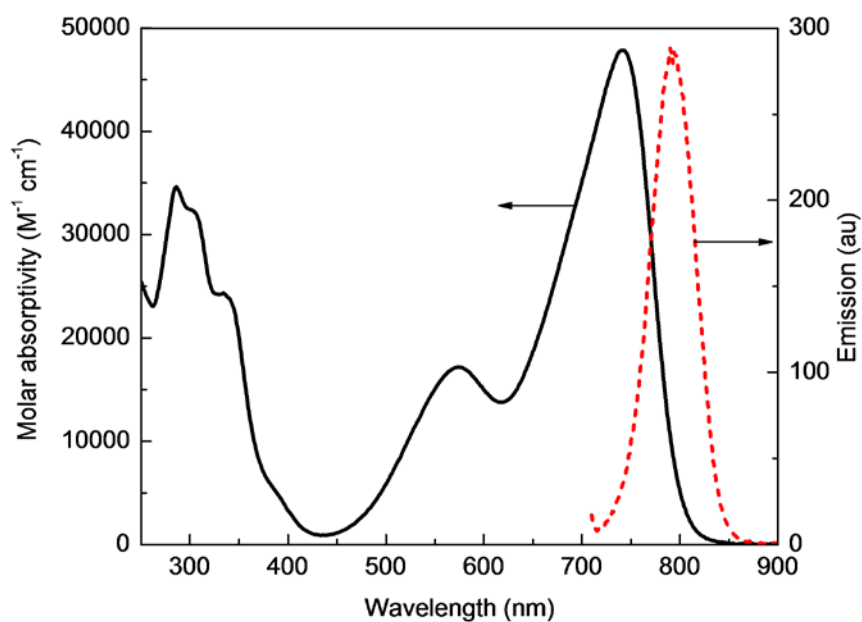

Figure S12: WS1BF<sub>2</sub> absorbance and emission in CHCl<sub>3</sub>.

### Cyclic voltammetry plots of ADP series

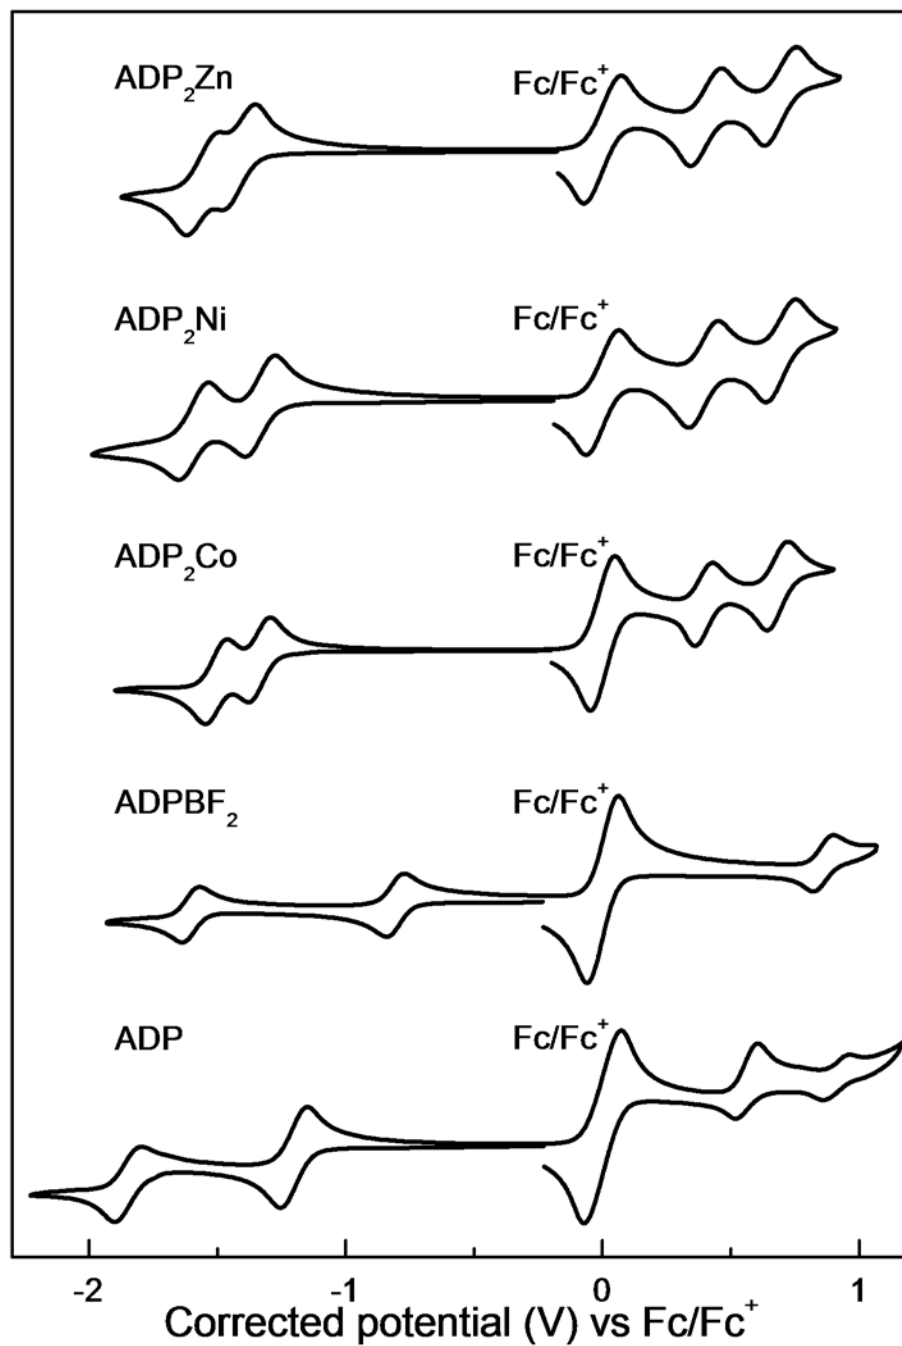

Figure S13: Cyclic voltammetry plots of ADP series measured in DCM/TBAPF (0.1 M) with Fc/Fc<sup>+</sup> as internal standard, scan rate 100mV/s. Potentials are corrected to Fc/Fc<sup>+</sup>.

### P3HT Fluorescence quenching in solution

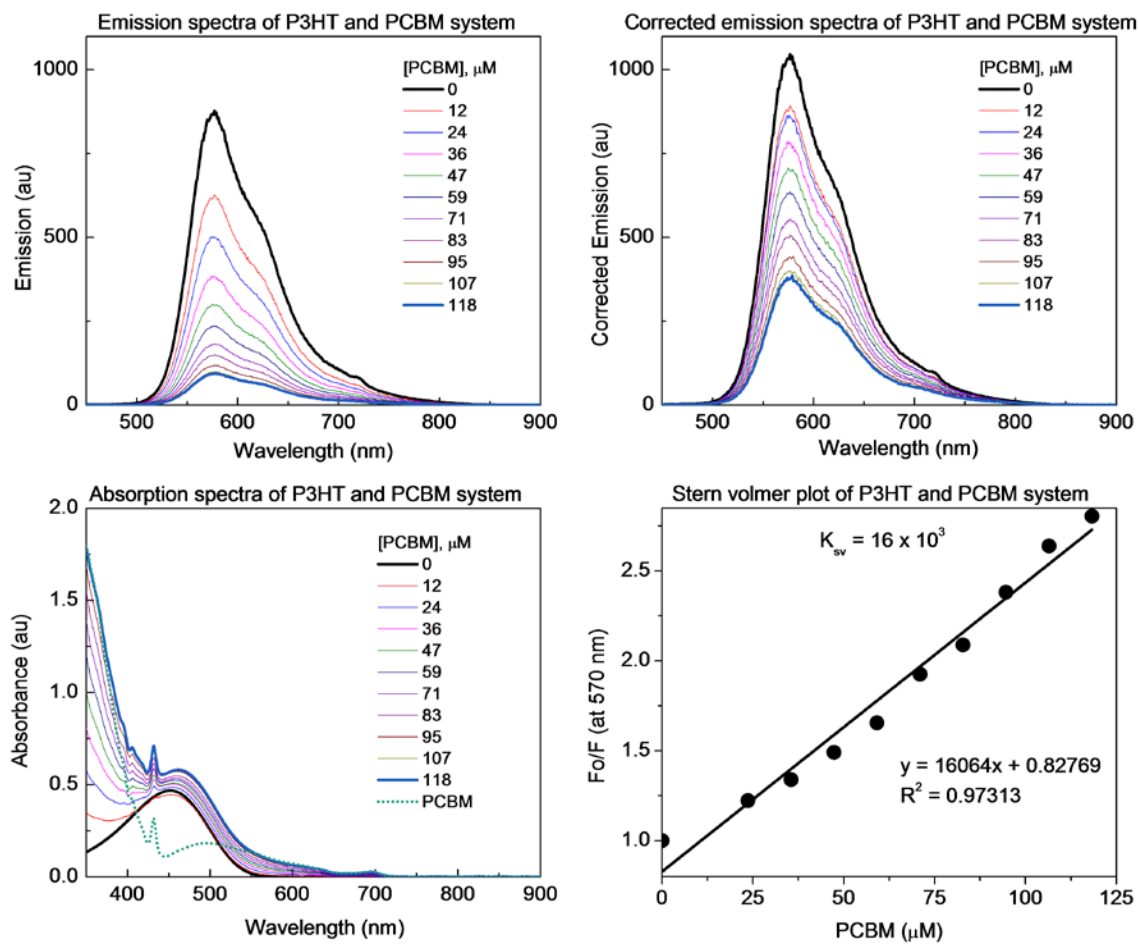

Figure S14: P3HT fluorescence quenching with PCBM.

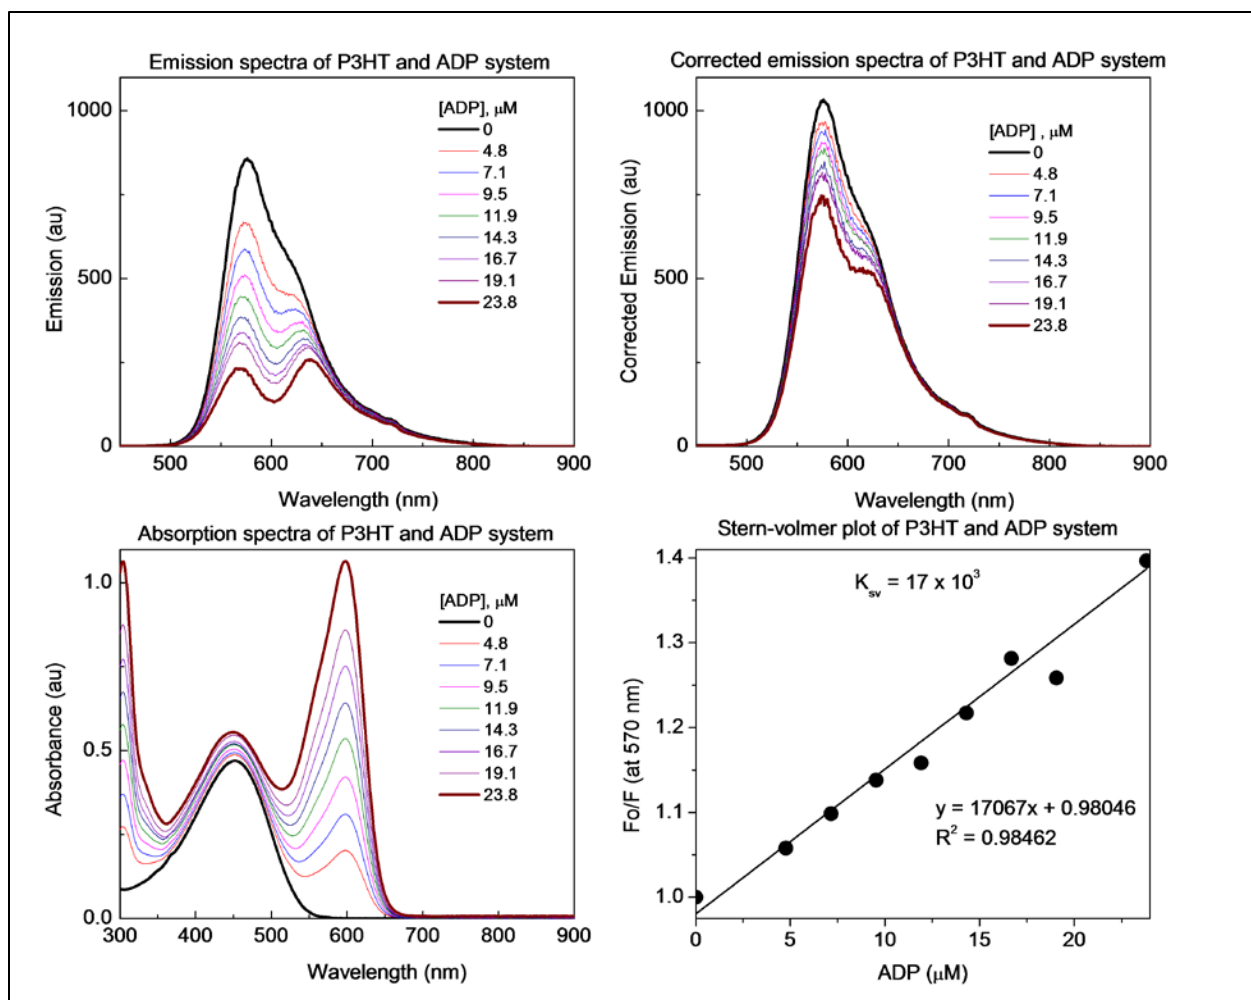

Figure S15: P3HT fluorescence quenching with ADP.

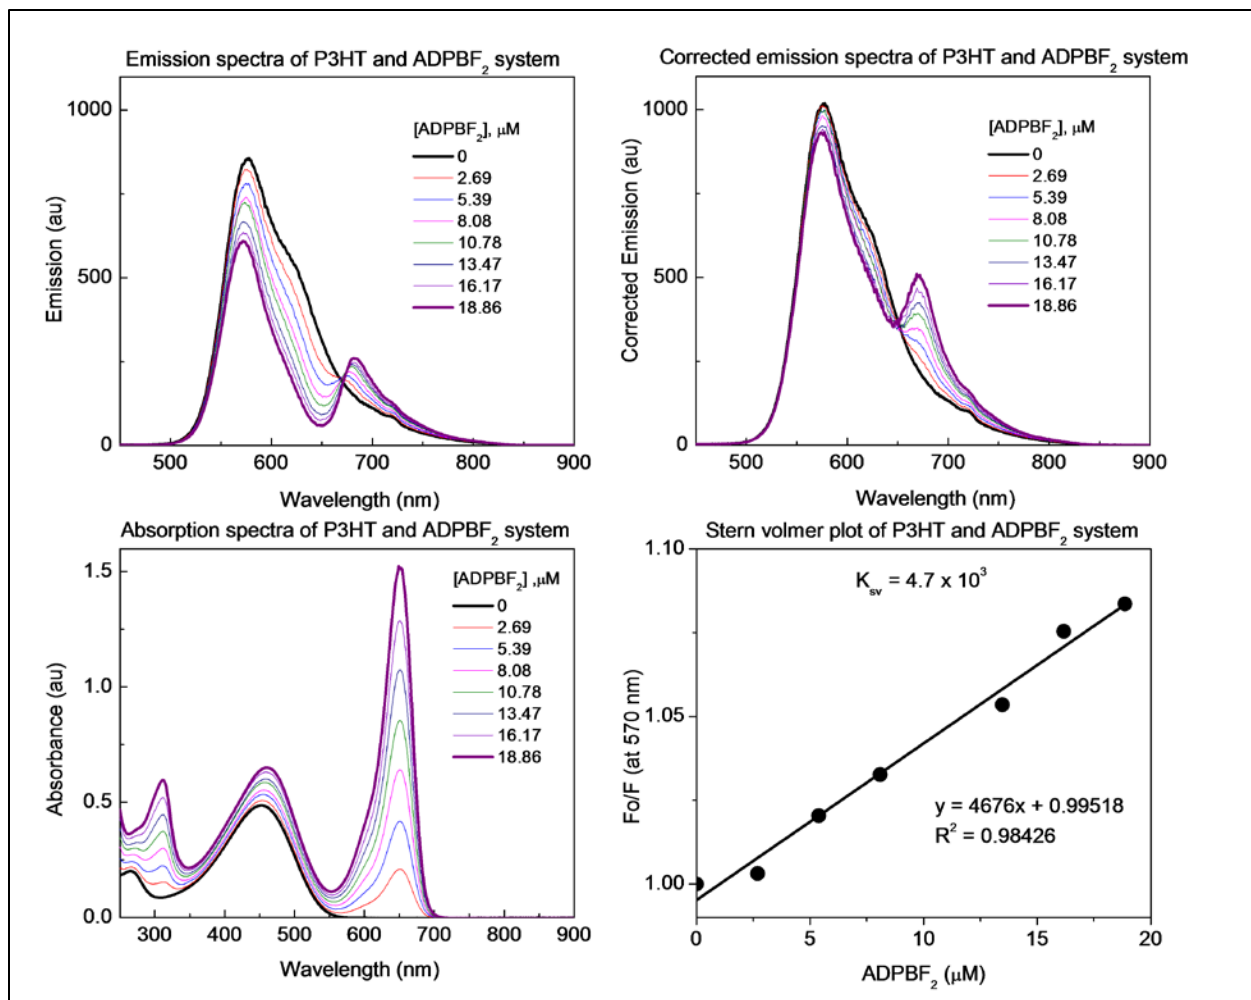

Figure S16: P3HT fluorescence quenching with ADPBF<sub>2</sub>

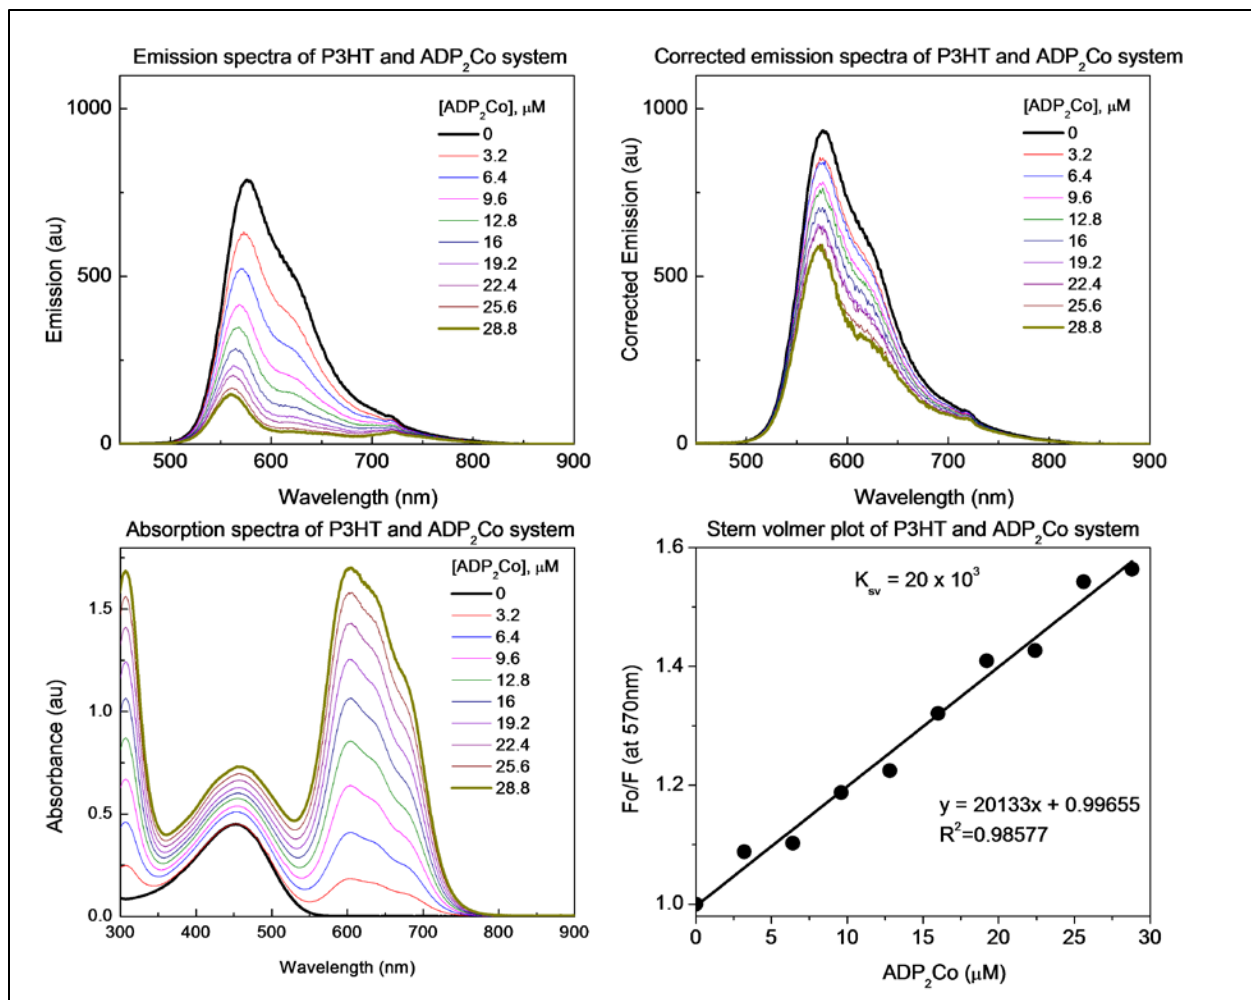

Figure S17: P3HT fluorescence quenching with ADP<sub>2</sub>Co

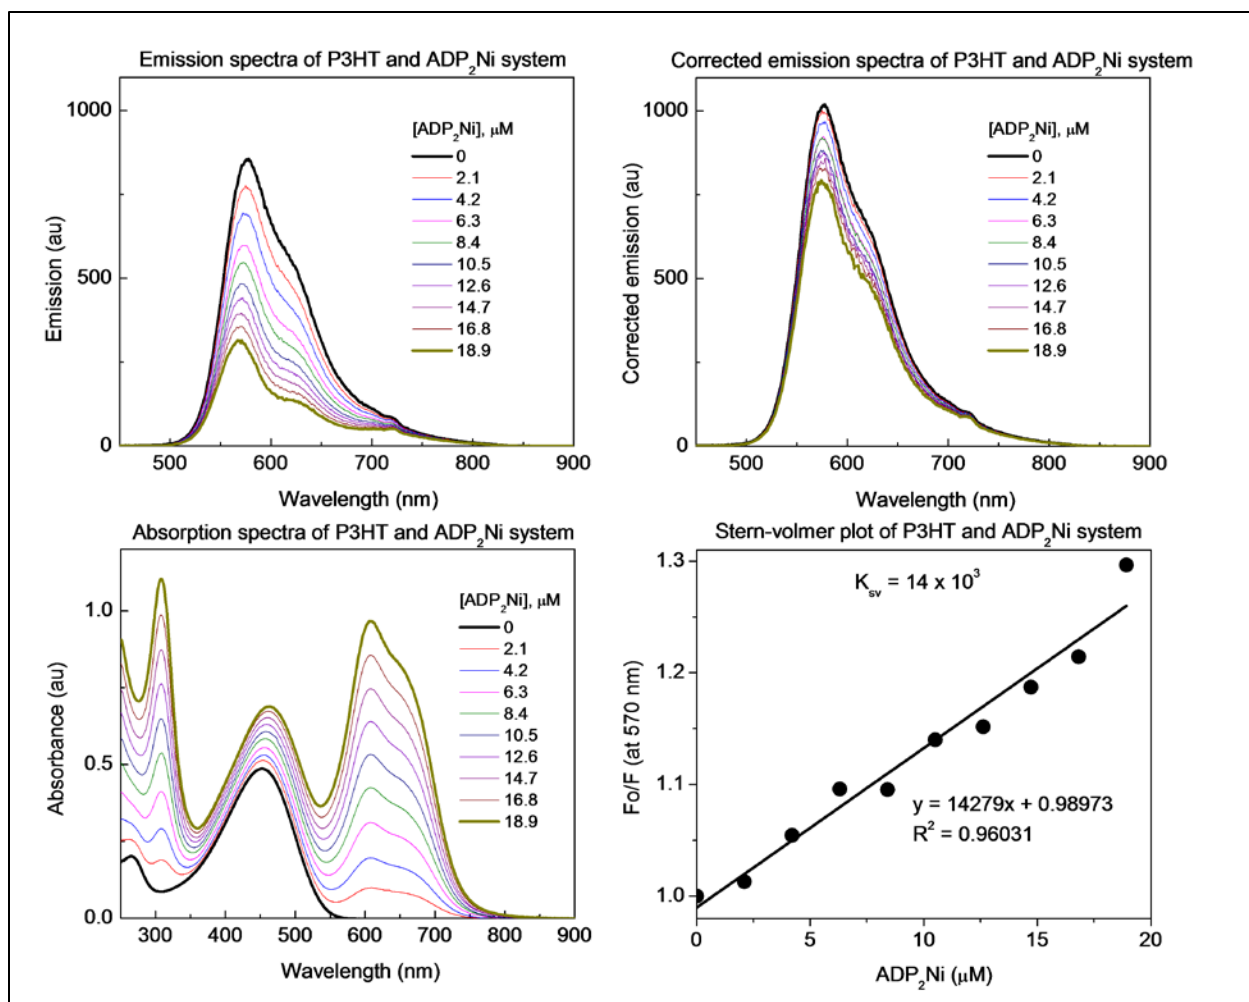

Figure S18: P3HT fluorescence quenching with  $\text{ADP}_2\text{Ni}$

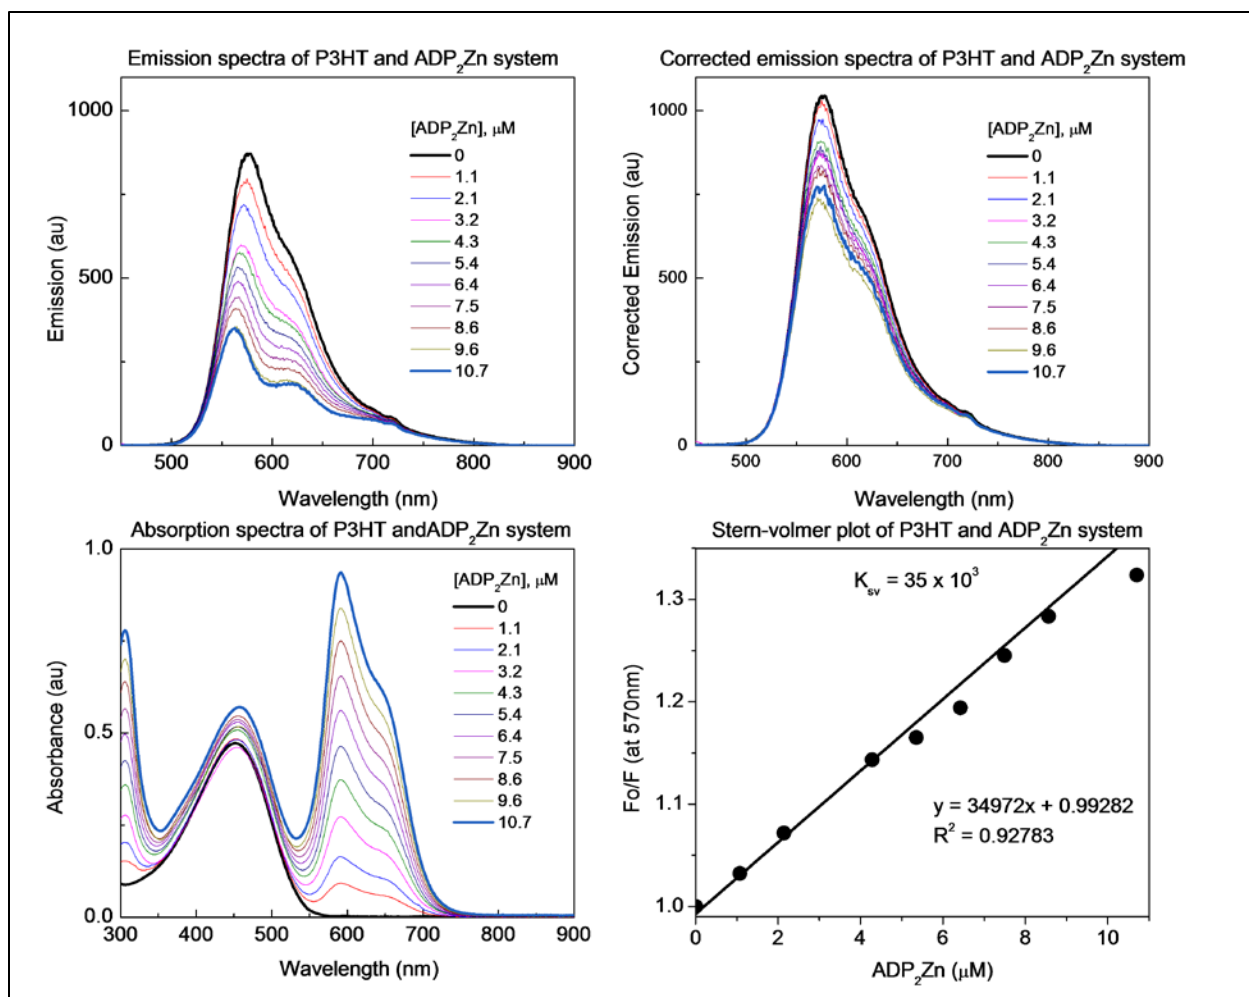

Figure S19: P3HT fluorescence quenching with ADP<sub>2</sub>Zn.



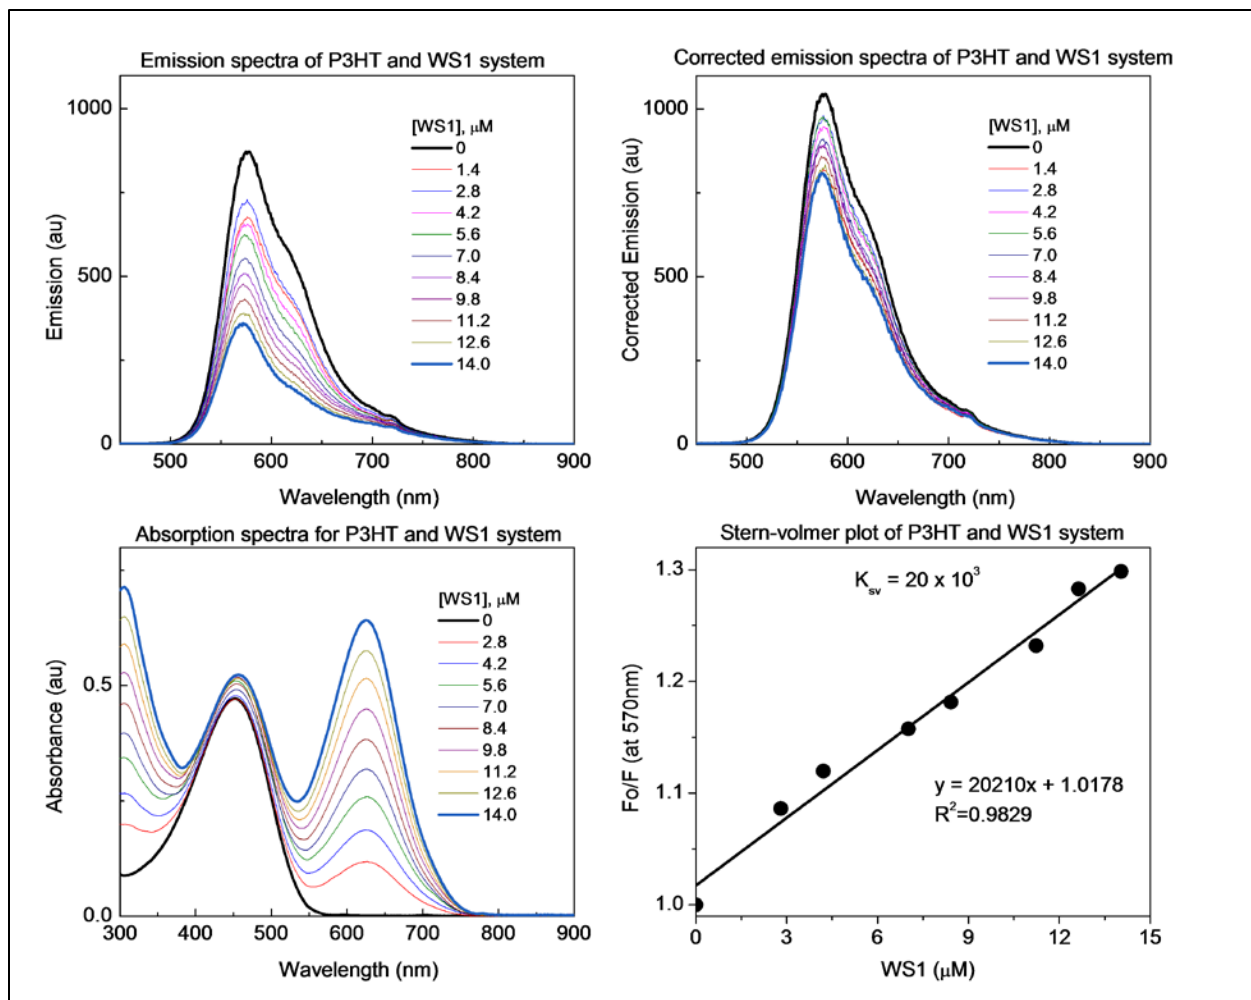

Figure S20: P3HT fluorescence quenching with WS1.

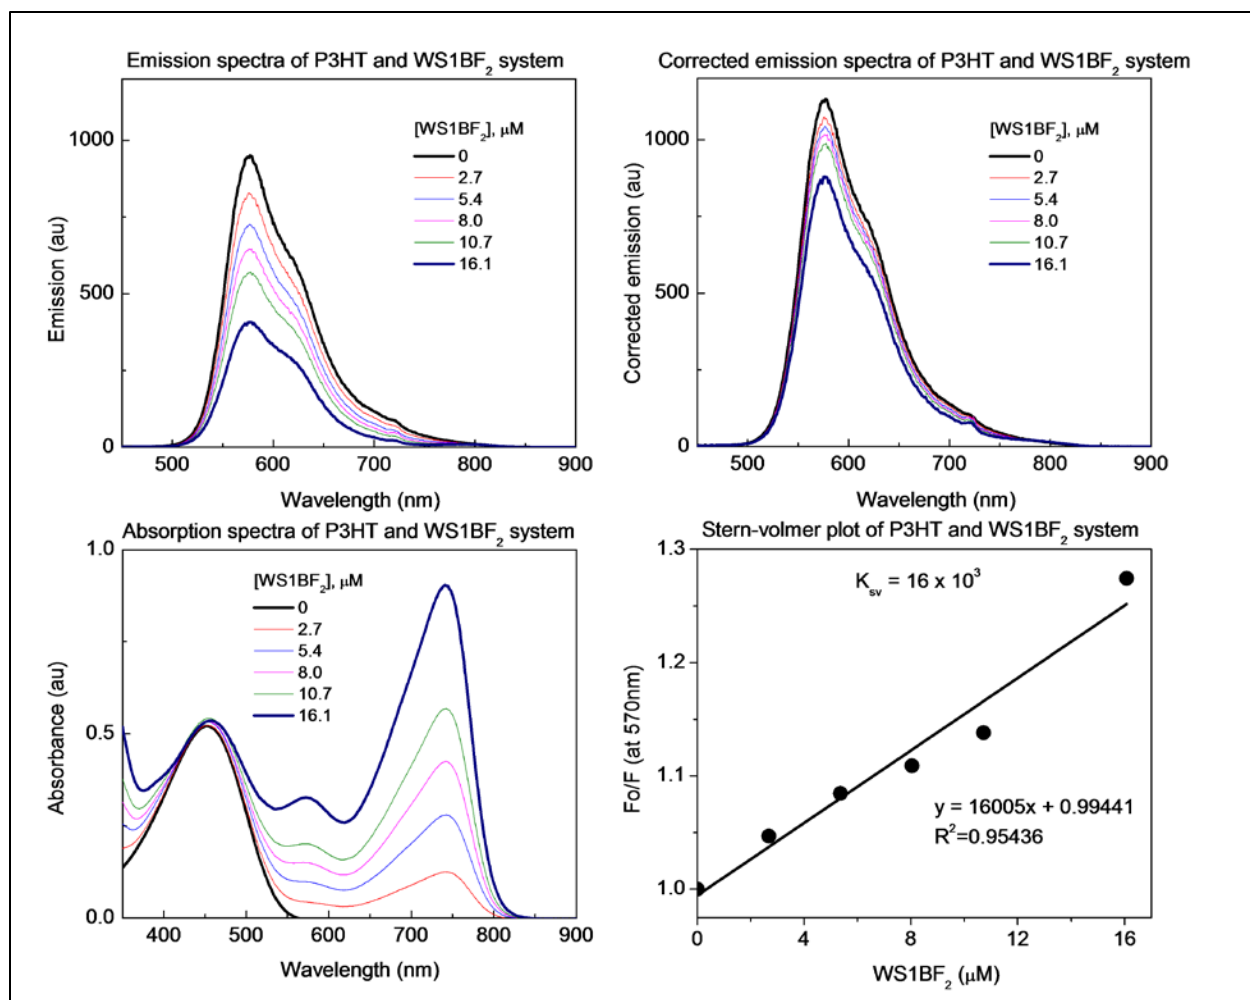

Figure S21: P3HT fluorescence quenching with WS1BF<sub>2</sub>.

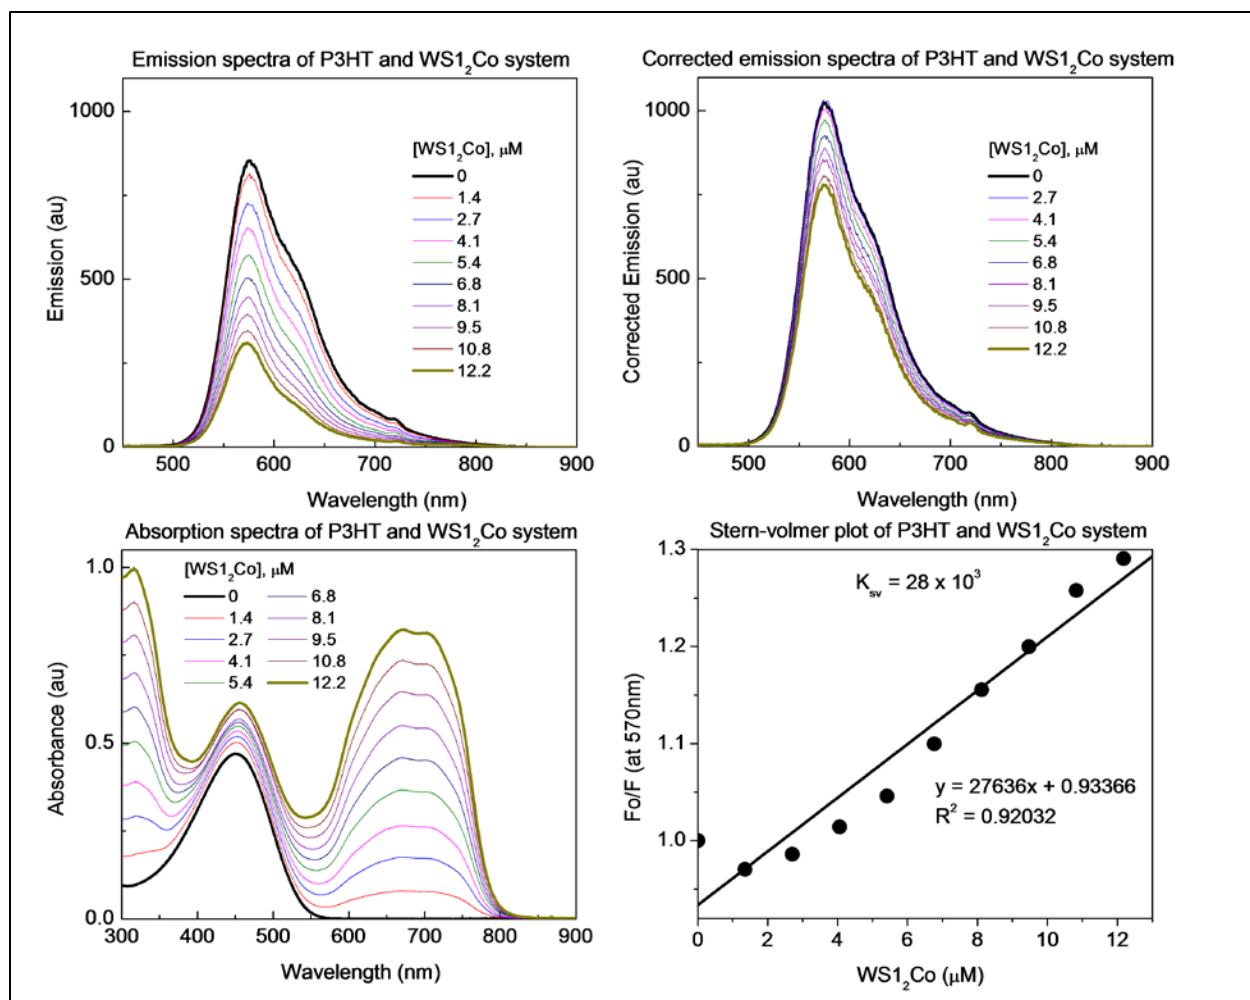

Figure S22: P3HT fluorescence quenching with WS<sub>12</sub>Co.

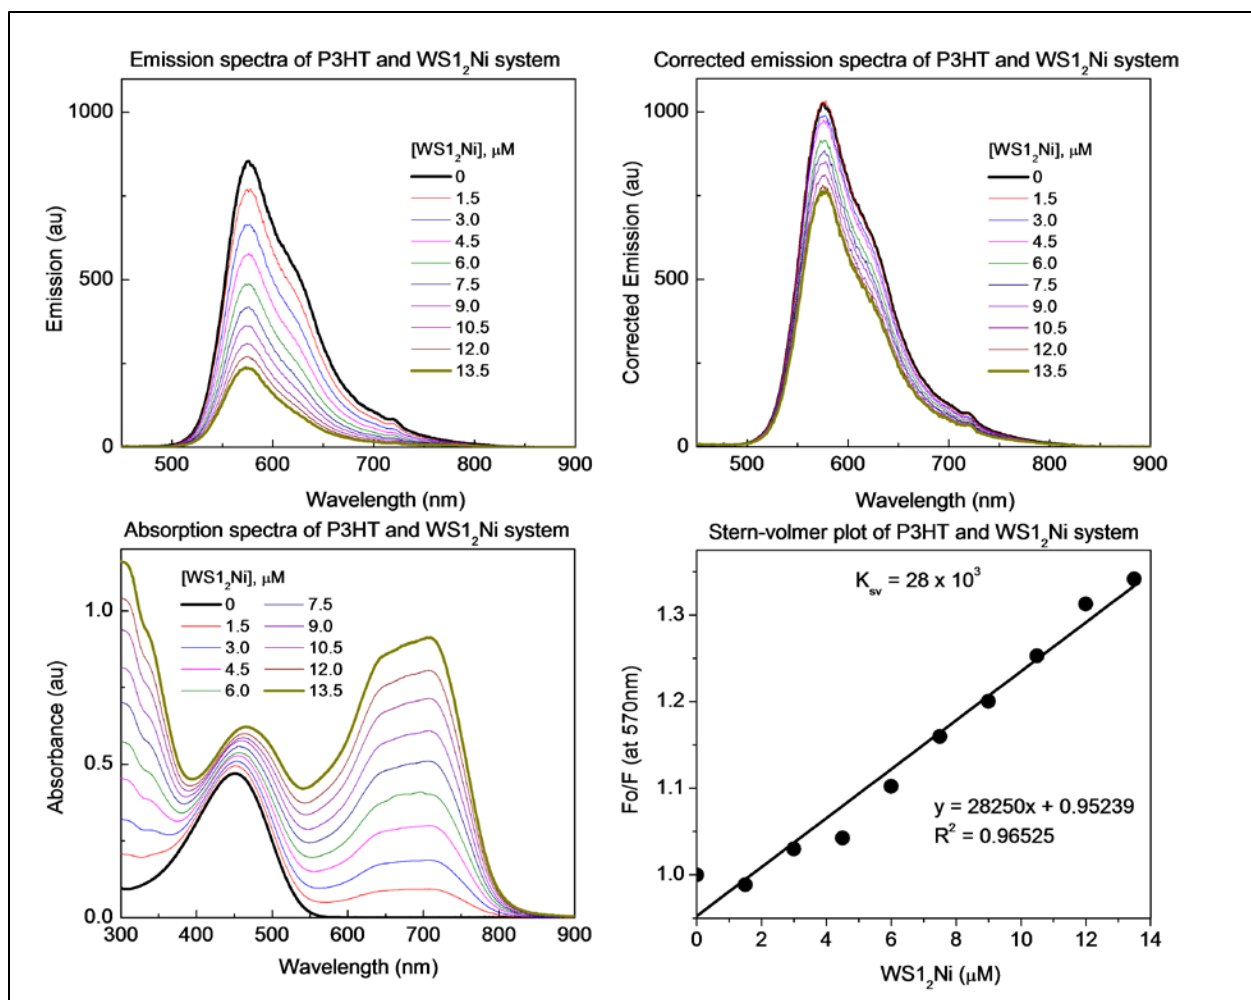

Figure S23: P3HT fluorescence quenching with WS<sub>12</sub>Ni.

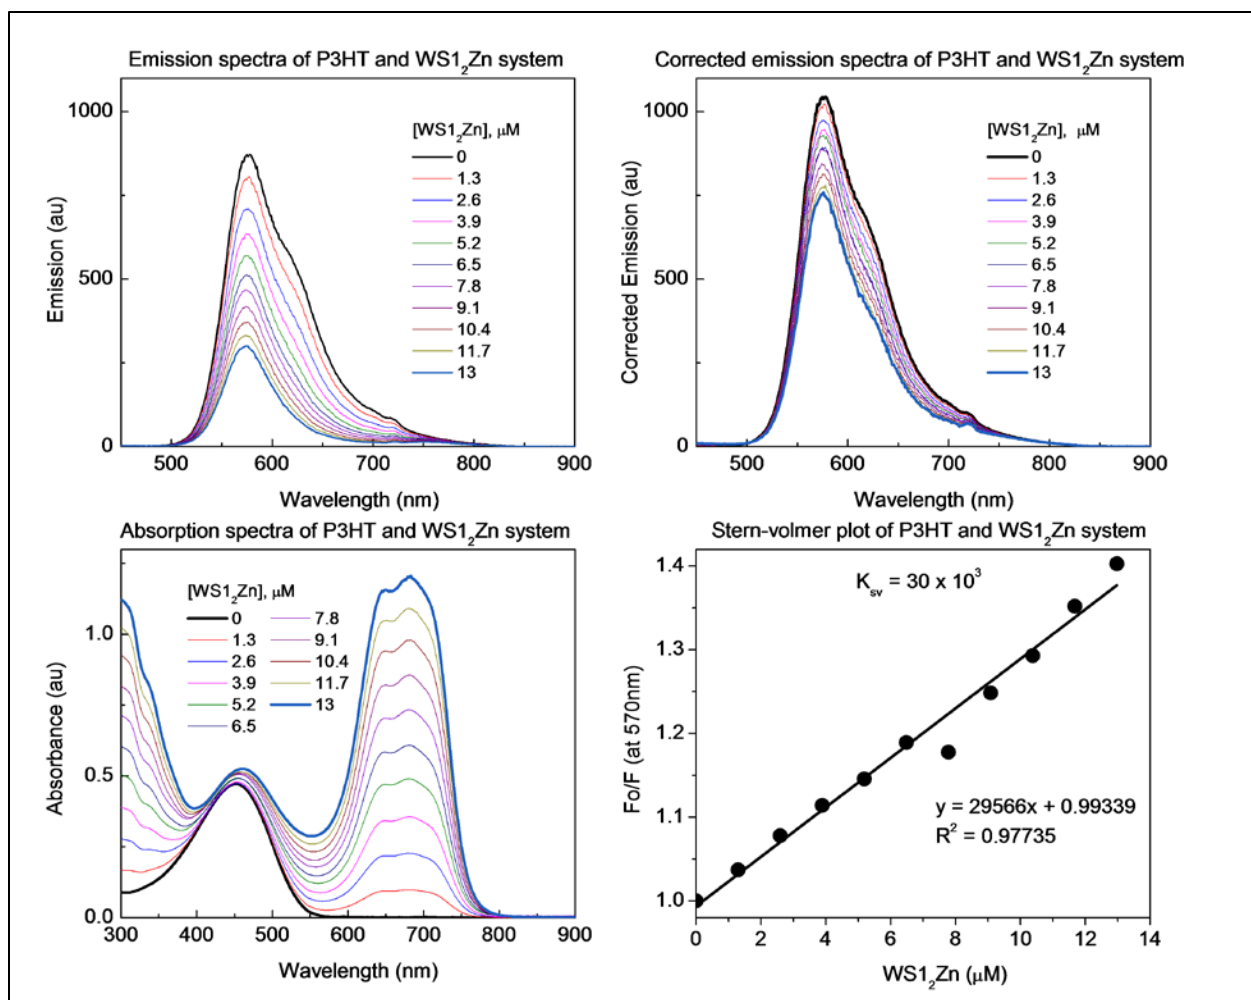

Figure S24: P3HT fluorescence quenching with WS<sub>12</sub>Zn.

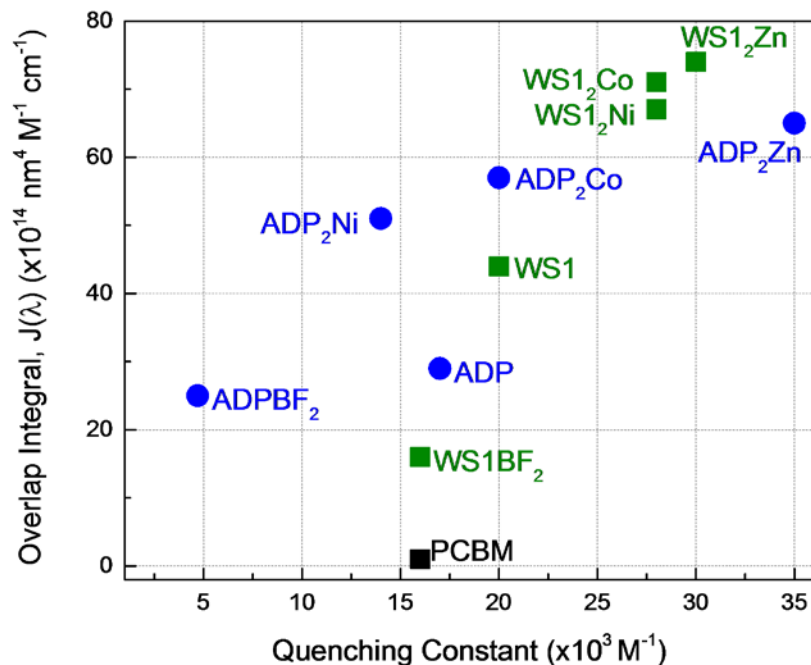

Figure S25: Plot of overlap integral versus Stern-Volmer (or quenching) constant for all compounds studied.

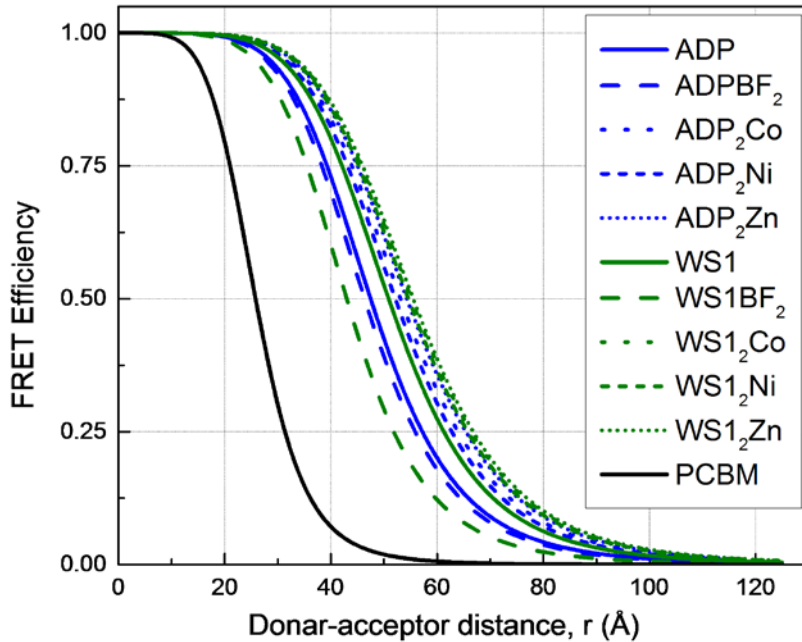

Figure S26: FRET efficiency as a function of donor-acceptor distance for PCBM and all aza-DIPY derivatives studied.

### DFT Calculation

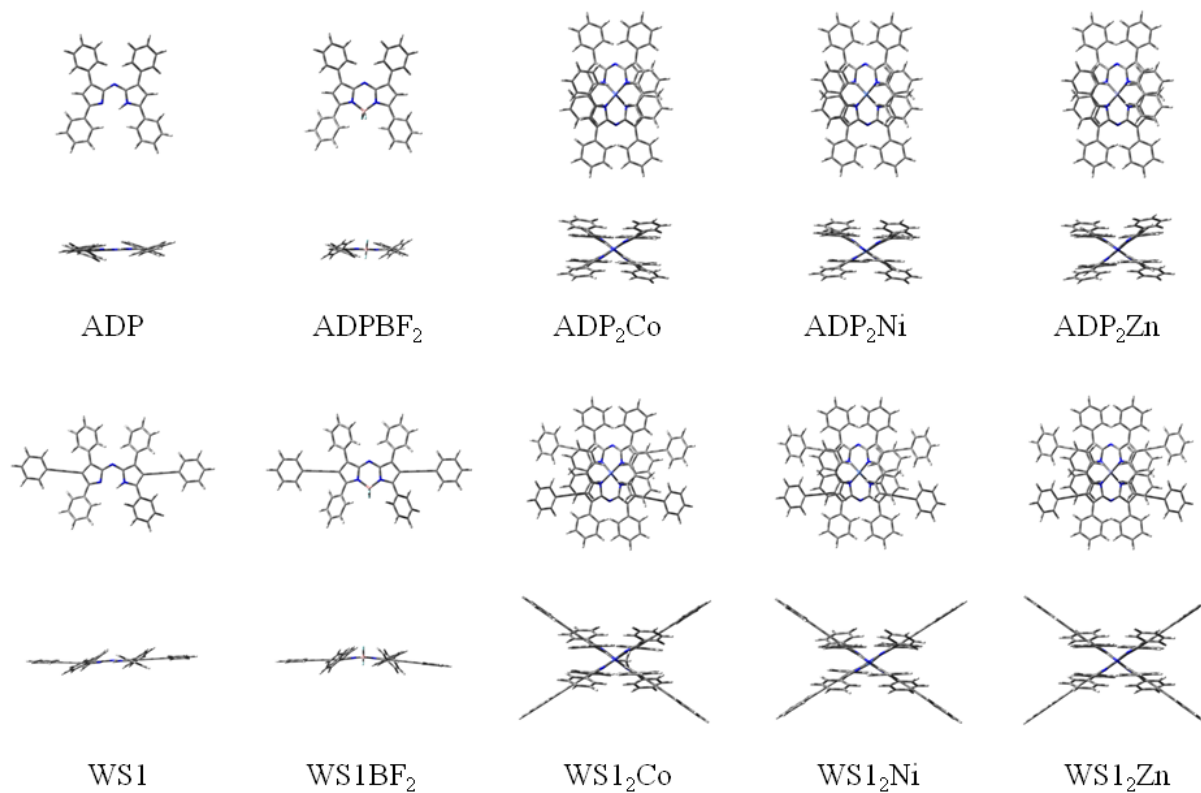

Figure S27: Optimized molecular structures of aza-DIPY molecules.



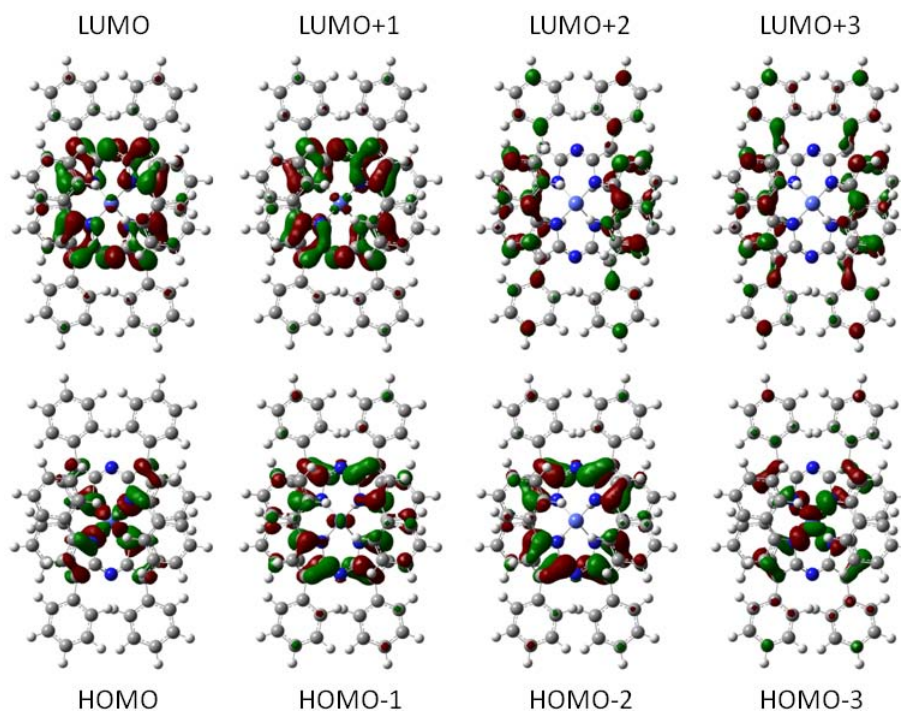

Figure S28: Calculated molecular orbital for ADP<sub>2</sub>Co.

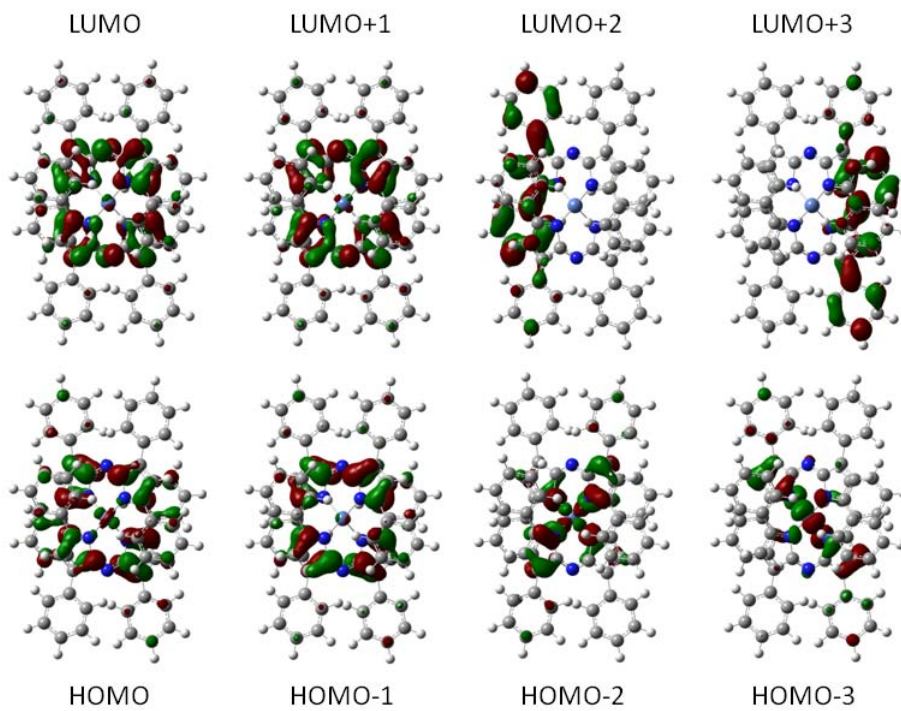

Figure S29: Calculated molecular orbital for ADP<sub>2</sub>Ni.



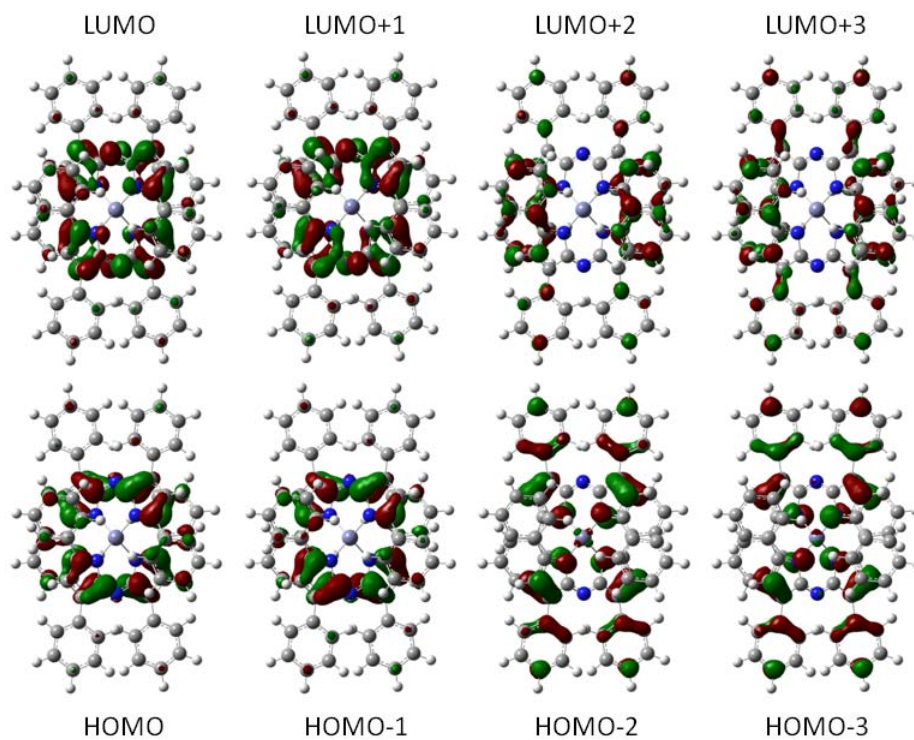

Figure S30: Calculated molecular orbital for ADP<sub>2</sub>Zn.

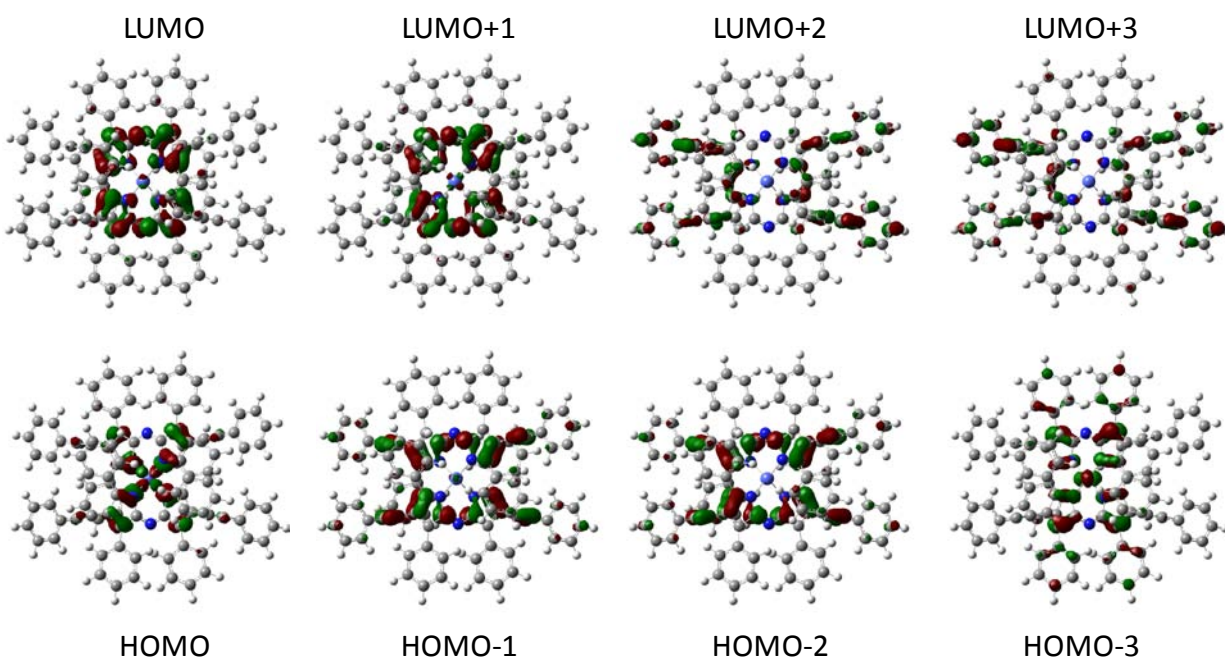

Figure S31: Calculated molecular orbital for WS<sub>12</sub>Co.

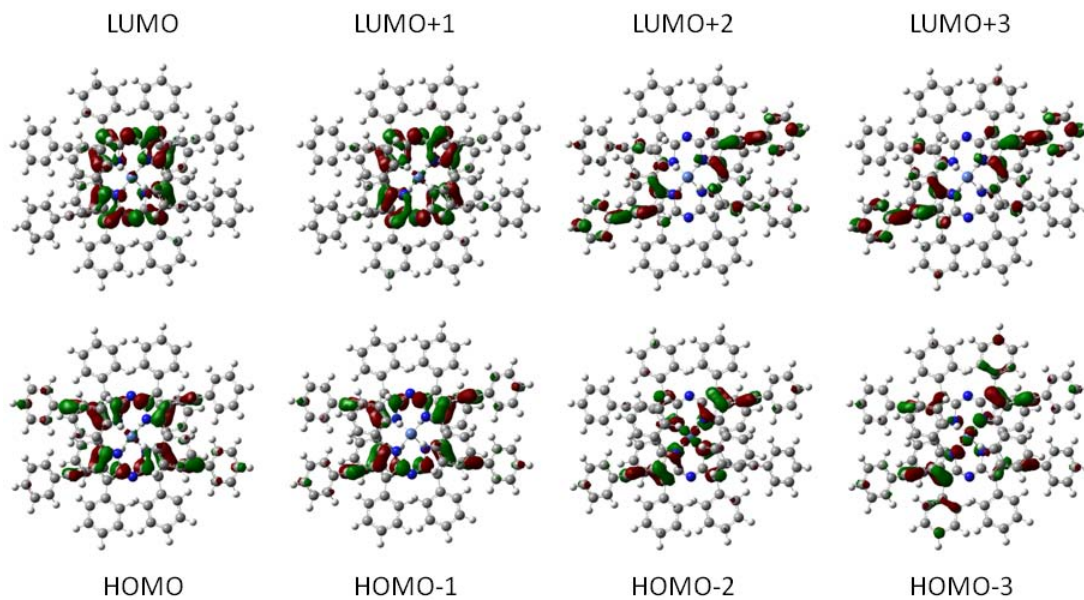

Figure S32: Calculated molecular orbital for WS<sub>12</sub>Ni.

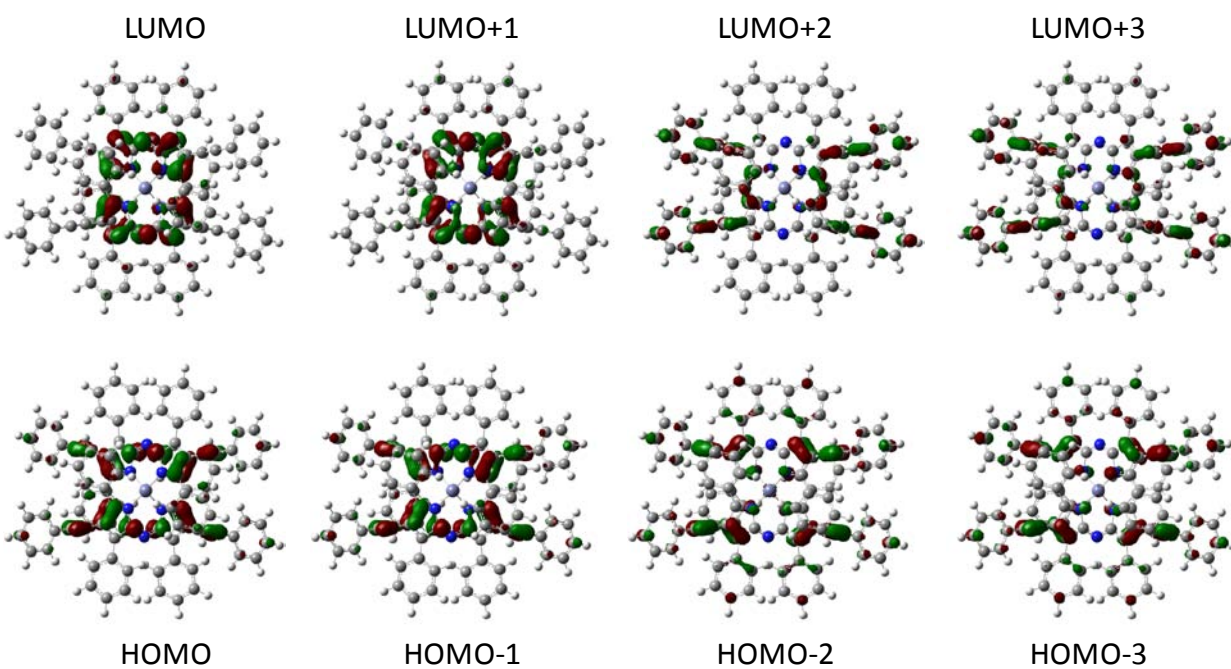

Figure S33: Calculated molecular orbital for WS<sub>12</sub>Zn.

Table S3: Selected geometric parameters for ground state optimized geometries deduced from the pbepbe/6-31G(d,p) method<sup>a</sup>

|       | Calculated          | Experimental <sup>b</sup>                             | Calculated          |
|-------|---------------------|-------------------------------------------------------|---------------------|
|       | ADP <sub>2</sub> Co |                                                       | WS1 <sub>2</sub> Co |
| M—N   | 1.959               | 1.979 (O'Shea 2009)                                   | 1.957               |
| N—M—N | 97.0/106.6/126.2    | 94.22/102-106/130.92 (O'Shea 2009)                    | 97.1/106.1/126.7    |
|       | ADP <sub>2</sub> Ni |                                                       | WS1 <sub>2</sub> Ni |
| M—N   | 1.948               | 1.968(O'Shea 2009)                                    | 1.945               |
| N—M—N | 95.0/105.3/138.9    | 92.81/102-106/131.8(O'Shea 2009)                      | 95.2/104.8/140.3    |
|       | ADP <sub>2</sub> Zn |                                                       | WS1 <sub>2</sub> Zn |
| M—N   | 1.992               | 1.987(O'Shea 2009)<br>1.985(Gray 2008)                | 1.991               |
| N—M—N | 96.5/108.9/124.3    | 94.66/102-106/130.07(O'Shea 2009)<br>94.56(Gray 2008) | 96.3/107.6/125.9    |

<sup>a</sup>All distances are in Å and the angles are in degrees, <sup>b</sup> from crystallographic data

References: Palma, A.; Gallagher, J. F.; Mueller-Bunz, H.; Wolowska, J.; McInnes, E. J. L.; O'Shea, D. F. *Dalton Trans.* **2009**, 273–279.

Teets, T. S.; Partyka, D. V.; Updegraff, J. B.; Gray, T. G. *Inorg. Chem.* **2008**, *47*, 2338–2346.

Table: S4: The box dimensions for ADP and WS1 metal complexes, as well as that of PCBM for comparison.

|                     | a, Å | b, Å | c, Å | Size, (Å) <sup>3</sup> |
|---------------------|------|------|------|------------------------|
| PCBM                | 13   | 13   | 8    | 1400                   |
| ADP <sub>2</sub> Co | 18   | 13   | 8    | 1800                   |
| ADP <sub>2</sub> Ni | 19   | 13   | 8    | 1800                   |
| ADP <sub>2</sub> Zn | 19   | 13   | 8    | 1800                   |
| WS1 <sub>2</sub> Co | 21   | 19   | 12   | 4700                   |
| WS1 <sub>2</sub> Ni | 21   | 19   | 13   | 5300                   |
| WS1 <sub>2</sub> Zn | 21   | 19   | 13   | 4800                   |

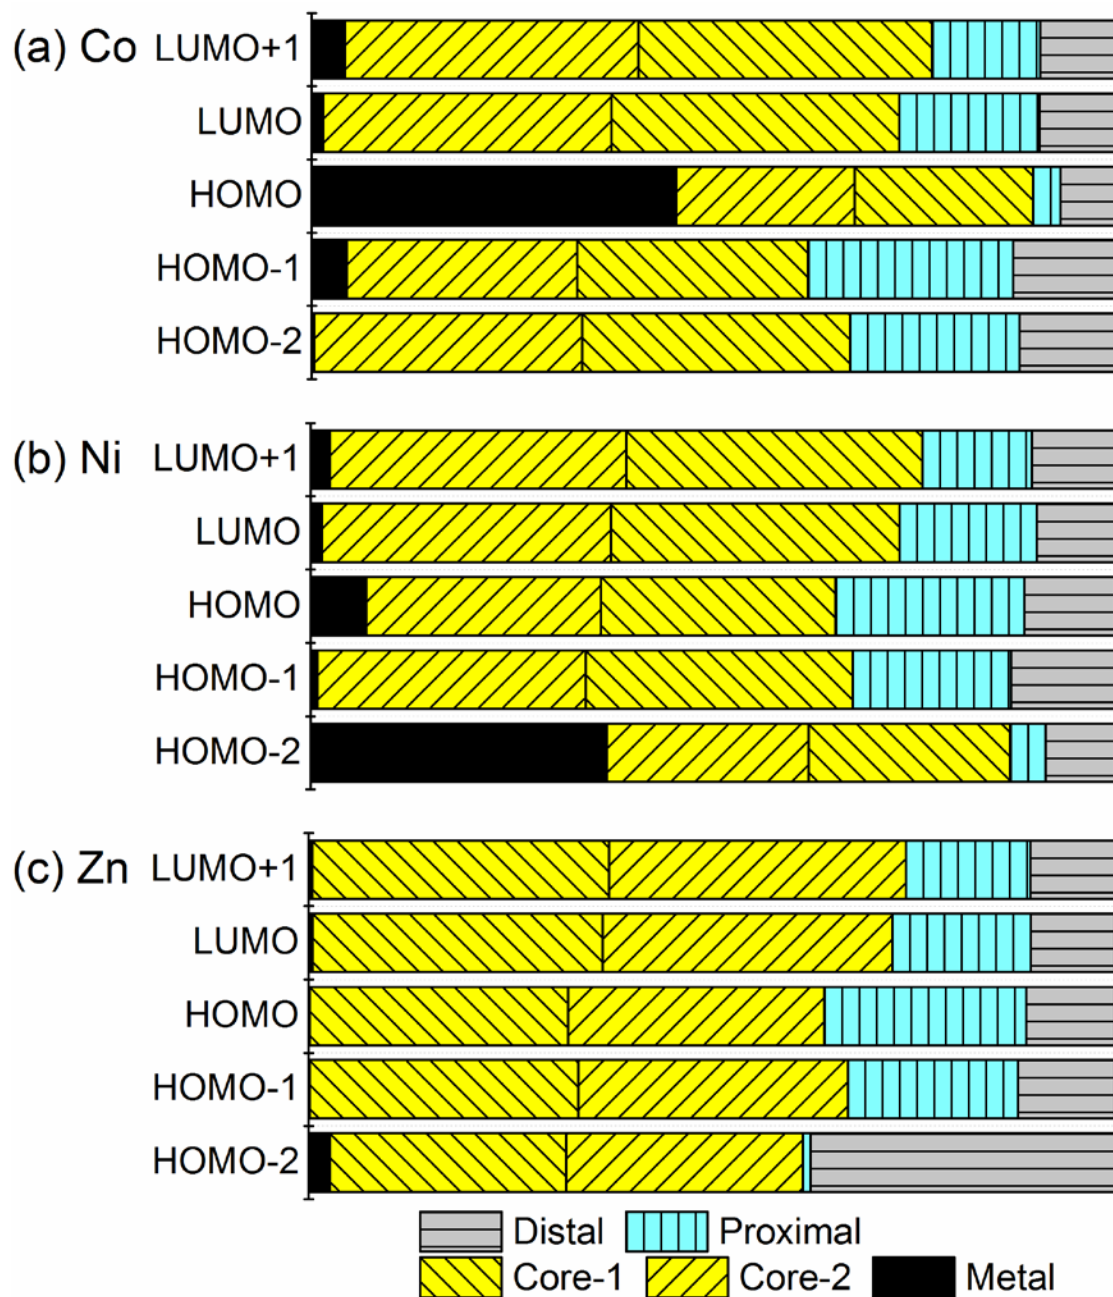

Figure S34: Estimated calculated contribution of different parts of ADP<sub>2</sub>M complexes. (a) ADP<sub>2</sub>Co; (b) ADP<sub>2</sub>Ni; (c) ADP<sub>2</sub>Zn



The optimized geometries in Cartesian coordinates (Å), energies (hartrees), frequencies ( $\text{cm}^{-1}$ ) of WS1, WS1BF<sub>2</sub>, WS1<sub>2</sub>Co, WS1<sub>2</sub>Ni, and WS1<sub>2</sub>Zn using the pbepbe/6-31G(d,p) level of theory.

WS1-----

Electronic Energy (au): -2009.49472304  
Sum of electronic and zero-point Energies (au): -2008.867920  
Sum of electronic and thermal Energies (au): -2008.825682  
Sum of electronic and thermal Enthalpies (au): -2008.824738  
Sum of electronic and thermal Free Energies (au): -2008.950876

Optimized geometry

|     |            |           |           |
|-----|------------|-----------|-----------|
| C1  | 3.415633   | 0.122610  | 0.012900  |
| C2  | 2.463397   | -0.945590 | 0.033479  |
| C3  | 1.169468   | -0.328797 | 0.033218  |
| C4  | -1.178550  | -0.299409 | 0.032357  |
| C5  | -2.480349  | -0.970140 | 0.060216  |
| C6  | -3.420311  | 0.073275  | 0.113845  |
| C7  | -2.639882  | 1.329283  | 0.110588  |
| N8  | 1.362071   | 1.050571  | 0.003498  |
| N9  | -0.019949  | -0.947425 | 0.038478  |
| N10 | -1.327893  | 1.091012  | 0.056124  |
| C11 | -3.161097  | 2.700107  | 0.140802  |
| C12 | -2.374343  | 3.754430  | -0.382939 |
| C13 | -4.419892  | 3.011598  | 0.706451  |
| C14 | -2.836101  | 5.072283  | -0.354075 |
| H15 | -1.404797  | 3.514364  | -0.827116 |
| C16 | -4.874502  | 4.335002  | 0.740026  |
| H17 | -5.030027  | 2.215641  | 1.137708  |
| C18 | -4.089639  | 5.368678  | 0.207289  |
| H19 | -2.220062  | 5.873250  | -0.773406 |
| H20 | -5.845480  | 4.560961  | 1.190730  |
| H21 | -4.450871  | 6.401017  | 0.230322  |
| C22 | 2.726249   | -2.388422 | 0.031775  |
| C23 | 1.850923   | -3.286993 | 0.691451  |
| C24 | 3.856849   | -2.921609 | -0.633954 |
| C25 | 2.102336   | -4.663179 | 0.683852  |
| H26 | 0.972449   | -2.893299 | 1.205730  |
| C27 | 4.102603   | -4.299172 | -0.636651 |
| H28 | 4.531729   | -2.249982 | -1.168923 |
| C29 | 3.229058   | -5.177016 | 0.023405  |
| H30 | 1.414390   | -5.337855 | 1.202419  |
| H31 | 4.977384   | -4.689567 | -1.165658 |
| H32 | 3.424263   | -6.253546 | 0.021658  |
| C33 | 4.820478   | 0.005220  | 0.002762  |
| C34 | -4.820222  | -0.032831 | 0.044315  |
| C35 | 6.046891   | -0.110243 | -0.006649 |
| C36 | -6.046940  | -0.131690 | -0.042563 |
| C37 | -7.457827  | -0.251958 | -0.145861 |
| C38 | -8.067458  | -1.532145 | -0.217254 |
| C39 | -8.282505  | 0.902960  | -0.180381 |
| C40 | -9.456700  | -1.645934 | -0.317987 |
| H41 | -7.434454  | -2.423475 | -0.195662 |
| C42 | -9.670516  | 0.774812  | -0.281013 |
| H43 | -7.816435  | 1.890900  | -0.130588 |
| C44 | -10.263387 | -0.496605 | -0.349871 |
| H45 | -9.914386  | -2.638026 | -0.373487 |
| H46 | -10.295114 | 1.672586  | -0.307436 |
| H47 | -11.350098 | -0.591341 | -0.429758 |
| C48 | 7.461238   | -0.250241 | -0.016722 |
| C49 | 8.059094   | -1.520959 | 0.186526  |

|     |           |           |           |
|-----|-----------|-----------|-----------|
| C50 | 8.297714  | 0.875831  | -0.229819 |
| C51 | 9.450571  | -1.653796 | 0.176084  |
| H52 | 7.416799  | -2.390099 | 0.352874  |
| C53 | 9.687816  | 0.729000  | -0.236716 |
| H54 | 7.840362  | 1.855963  | -0.390734 |
| C55 | 10.269940 | -0.532832 | -0.034356 |
| H56 | 9.899621  | -2.638702 | 0.334589  |
| H57 | 10.322112 | 1.604832  | -0.402222 |
| H58 | 11.358162 | -0.642278 | -0.040925 |
| C59 | 3.152650  | 2.744593  | -0.018126 |
| C60 | 4.416642  | 3.102357  | 0.509197  |
| C61 | 2.329103  | 3.764292  | -0.556441 |
| C62 | 4.837247  | 4.436160  | 0.495708  |
| H63 | 5.054840  | 2.331939  | 0.946097  |
| C64 | 2.756984  | 5.094567  | -0.566505 |
| H65 | 1.362682  | 3.506443  | -1.000374 |
| C66 | 4.012857  | 5.437220  | -0.040507 |
| H67 | 5.813069  | 4.696693  | 0.915845  |
| C68 | 2.111015  | 5.866597  | -0.994203 |
| H69 | 4.346473  | 6.478747  | -0.049611 |
| C70 | 2.685960  | 1.361284  | 0.004347  |
| C71 | -2.719832 | -2.414509 | 0.041609  |
| C72 | -1.834208 | -3.297655 | -0.626360 |
| C73 | -3.847100 | -2.969354 | 0.697915  |
| C74 | -2.072407 | -4.676350 | -0.636305 |
| H75 | -0.958671 | -2.889540 | -1.133848 |
| C76 | -4.079164 | -4.348487 | 0.684187  |
| H77 | -4.529727 | -2.309740 | 1.238612  |
| C78 | -3.194883 | -5.209822 | 0.015525  |
| H79 | -1.376645 | -5.337973 | -1.161367 |
| H80 | -4.950931 | -4.754419 | 1.206613  |
| H81 | -3.378748 | -6.288313 | 0.004460  |
| H82 | 0.528193  | 1.660172  | 0.058294  |

Frequencies (cm<sup>-1</sup>):

|          |          |          |
|----------|----------|----------|
| 9.9244   | 13.4403  | 15.6184  |
| 18.2434  | 18.7534  | 24.9292  |
| 28.1372  | 30.5752  | 36.3779  |
| 44.3151  | 45.4905  | 52.1258  |
| 55.5620  | 58.0872  | 61.9963  |
| 68.5060  | 77.1545  | 81.4850  |
| 102.9197 | 109.1225 | 121.9576 |
| 124.7838 | 134.2514 | 142.1662 |
| 170.4562 | 185.5026 | 202.8741 |
| 206.4511 | 216.0203 | 220.5628 |
| 227.6508 | 240.7983 | 248.2970 |
| 261.9435 | 287.1888 | 329.1619 |
| 333.7529 | 360.7398 | 362.9392 |
| 368.5868 | 382.3826 | 395.1666 |
| 395.3041 | 397.0101 | 398.3041 |
| 399.5684 | 400.5403 | 404.7923 |
| 437.9503 | 448.5556 | 459.4851 |
| 465.8922 | 474.7313 | 488.8376 |
| 495.9657 | 501.7669 | 506.9560 |
| 519.7442 | 532.3348 | 540.3475 |
| 574.3087 | 586.4783 | 592.9757 |
| 607.9022 | 609.6257 | 609.8271 |
| 610.2987 | 613.2363 | 613.6465 |
| 639.6996 | 647.8094 | 659.9354 |
| 670.6262 | 674.6121 | 678.4384 |
| 678.8953 | 679.7115 | 679.9557 |
| 680.8898 | 682.4254 | 683.0106 |

|           |           |           |
|-----------|-----------|-----------|
| 689.4547  | 700.7475  | 715.6851  |
| 737.2325  | 742.4259  | 743.1336  |
| 752.9208  | 755.2626  | 763.8420  |
| 766.5409  | 773.6802  | 790.1585  |
| 803.2896  | 818.0114  | 820.1837  |
| 821.3413  | 823.6961  | 824.4736  |
| 827.3119  | 831.3669  | 846.6130  |
| 892.6218  | 892.9095  | 893.4460  |
| 895.2335  | 896.5290  | 905.8756  |
| 933.1699  | 935.3454  | 937.4359  |
| 937.6946  | 938.5881  | 941.8771  |
| 956.7718  | 958.1250  | 962.5820  |
| 962.6419  | 964.7331  | 964.9455  |
| 967.4145  | 981.5980  | 981.8510  |
| 982.2183  | 983.7152  | 984.0048  |
| 984.5163  | 988.8211  | 1011.3476 |
| 1025.7614 | 1026.8772 | 1028.5833 |
| 1033.2540 | 1033.7948 | 1036.1913 |
| 1057.3126 | 1076.9235 | 1077.2130 |
| 1079.2180 | 1082.9443 | 1085.9935 |
| 1091.0639 | 1129.9950 | 1141.5658 |
| 1149.6045 | 1149.7332 | 1150.2717 |
| 1150.4482 | 1150.9645 | 1152.6454 |
| 1166.0373 | 1167.1477 | 1167.8686 |
| 1173.6323 | 1176.6228 | 1177.0391 |
| 1177.5389 | 1196.8852 | 1231.0951 |
| 1250.0381 | 1278.0302 | 1282.0202 |
| 1291.1036 | 1292.1426 | 1297.4337 |
| 1304.1715 | 1307.1934 | 1314.2661 |
| 1340.1848 | 1349.5583 | 1349.5829 |
| 1355.2510 | 1355.4274 | 1362.4857 |
| 1364.2343 | 1378.5607 | 1408.5484 |
| 1419.9775 | 1430.7572 | 1437.0385 |
| 1437.5255 | 1437.8495 | 1442.4671 |
| 1445.1354 | 1450.8130 | 1468.0666 |
| 1475.4624 | 1486.1392 | 1490.5870 |
| 1494.4760 | 1504.9091 | 1513.5773 |
| 1525.1581 | 1535.2142 | 1552.3114 |
| 1570.2059 | 1571.8299 | 1576.6083 |
| 1578.2561 | 1581.9174 | 1583.1856 |
| 1606.0721 | 1606.8407 | 1607.0818 |
| 1607.4458 | 1607.7336 | 1608.7593 |
| 2212.5838 | 2229.1055 | 3116.3893 |
| 3117.3908 | 3120.0717 | 3121.1375 |
| 3121.2393 | 3121.5283 | 3124.8301 |
| 3126.0675 | 3127.4815 | 3127.5916 |
| 3127.7326 | 3128.0220 | 3136.6407 |
| 3137.0803 | 3137.2331 | 3138.5593 |
| 3138.5917 | 3139.3521 | 3142.7158 |
| 3143.0241 | 3145.9868 | 3147.5214 |
| 3148.9324 | 3149.0074 | 3150.7911 |
| 3153.5617 | 3159.7444 | 3160.9002 |
| 3164.3711 | 3166.6540 | 3272.6440 |

WS1BF<sub>2</sub>-----

Electronic Energy (au): -2233.39203838  
Sum of electronic and zero-point Energies (au): -2232.763836  
Sum of electronic and thermal Energies (au): -2232.719389  
Sum of electronic and thermal Enthalpies (au): -2232.718445  
Sum of electronic and thermal Free Energies (au): -2232.848244  
Optimized geometry

|     |            |           |           |
|-----|------------|-----------|-----------|
| B1  | -0.003767  | -1.719599 | 0.427707  |
| F2  | 0.004299   | -2.735039 | -0.511720 |
| F3  | -0.016542  | -2.209590 | 1.753312  |
| C4  | 3.356673   | 0.099308  | 0.052582  |
| C5  | 2.462859   | 1.196954  | 0.133847  |
| C6  | 1.152001   | 0.614335  | 0.245141  |
| C7  | -1.156169  | 0.613919  | 0.269987  |
| C8  | -2.464417  | 1.199978  | 0.144173  |
| C9  | -3.354148  | 0.106622  | -0.005989 |
| C10 | -2.570864  | -1.109506 | 0.066323  |
| N11 | 1.255251   | -0.785075 | 0.257176  |
| N12 | -0.002069  | 1.274252  | 0.279972  |
| N13 | -1.258971  | -0.784577 | 0.238350  |
| C14 | -3.105980  | -2.472586 | -0.008063 |
| C15 | -2.653685  | -3.504443 | 0.848308  |
| C16 | -4.135719  | -2.757156 | -0.937907 |
| C17 | -3.222055  | -4.779658 | 0.773479  |
| H18 | -1.869899  | -3.292866 | 1.577504  |
| C19 | -4.687583  | -4.039786 | -1.014853 |
| H20 | -4.479683  | -1.973977 | -1.616747 |
| C21 | -4.237157  | -5.054163 | -0.155973 |
| H22 | -2.871076  | -5.564867 | 1.449232  |
| H23 | -5.468280  | -4.248767 | -1.751983 |
| H24 | -4.674435  | -6.055331 | -0.212096 |
| C25 | 2.776698   | 2.628283  | 0.119316  |
| C26 | 1.871319   | 3.573730  | -0.424987 |
| C27 | 3.999574   | 3.101273  | 0.656464  |
| C28 | 2.183594   | 4.937096  | -0.430198 |
| H29 | 0.924789   | 3.227149  | -0.842979 |
| C30 | 4.303347   | 4.466506  | 0.649607  |
| H31 | 4.701290   | 2.391488  | 1.099649  |
| C32 | 3.399236   | 5.391206  | 0.104348  |
| H33 | 1.472861   | 5.649285  | -0.860154 |
| H34 | 5.248554   | 4.810984  | 1.079951  |
| H35 | 3.640324   | 6.458319  | 0.096759  |
| C36 | 4.758686   | 0.139045  | -0.076426 |
| C37 | -4.759812  | 0.148580  | -0.087733 |
| C38 | 5.985000   | 0.173165  | -0.187491 |
| C39 | -5.989783  | 0.183747  | -0.144446 |
| C40 | -7.408029  | 0.220269  | -0.215681 |
| C41 | -8.098674  | 1.459738  | -0.203612 |
| C42 | -8.155223  | -0.982933 | -0.303501 |
| C43 | -9.493974  | 1.487796  | -0.280096 |
| H44 | -7.525149  | 2.387842  | -0.131430 |
| C45 | -9.550215  | -0.940127 | -0.379392 |
| H46 | -7.624567  | -1.938972 | -0.310234 |
| C47 | -10.224628 | 0.291697  | -0.368441 |
| H48 | -10.015972 | 2.449073  | -0.269475 |
| H49 | -10.116018 | -1.873946 | -0.446539 |
| H50 | -11.316424 | 0.319492  | -0.427072 |
| C51 | 7.398710   | 0.214908  | -0.319275 |
| C52 | 8.071131   | 1.455781  | -0.466430 |
| C53 | 8.159490   | -0.982836 | -0.305595 |



|     |           |           |           |
|-----|-----------|-----------|-----------|
| C54 | 9.462506  | 1.490487  | -0.594271 |
| H55 | 7.486154  | 2.379471  | -0.480660 |
| C56 | 9.550358  | -0.933343 | -0.435159 |
| H57 | 7.642794  | -1.939778 | -0.191981 |
| C58 | 10.206946 | 0.299734  | -0.579096 |
| H59 | 9.970321  | 2.452758  | -0.707489 |
| H60 | 10.126948 | -1.862897 | -0.423011 |
| H61 | 11.295536 | 0.332572  | -0.679742 |
| C62 | 3.102742  | -2.481224 | 0.079823  |
| C63 | 4.138862  | -2.786556 | -0.835880 |
| C64 | 2.640620  | -3.495193 | 0.951839  |
| C65 | 4.687844  | -4.072081 | -0.882953 |
| H66 | 4.490649  | -2.018315 | -1.527487 |
| C67 | 3.206069  | -4.773257 | 0.906869  |
| H68 | 1.849034  | -3.268318 | 1.667766  |
| C69 | 4.228282  | -5.068439 | -0.008096 |
| H70 | 5.473746  | -4.297114 | -1.609762 |
| H71 | 2.846673  | -5.544225 | 1.594542  |
| H72 | 4.663564  | -6.071514 | -0.040972 |
| C73 | 2.570531  | -1.114657 | 0.128112  |
| C74 | -2.768357 | 2.631026  | 0.151706  |
| C75 | -1.967814 | 3.541989  | 0.886267  |
| C76 | -3.870070 | 3.141658  | -0.578446 |
| C77 | -2.261960 | 4.909215  | 0.886242  |
| H78 | -1.118097 | 3.165521  | 1.458543  |
| C79 | -4.157570 | 4.510229  | -0.574029 |
| H80 | -4.486861 | 2.458931  | -1.166995 |
| C81 | -3.357329 | 5.400589  | 0.158988  |
| H82 | -1.635025 | 5.594524  | 1.464398  |
| H83 | -5.007167 | 4.885059  | -1.152703 |
| H84 | -3.586232 | 6.470356  | 0.163402  |

Frequencies ( $\text{cm}^{-1}$ ):

|          |          |          |
|----------|----------|----------|
| 9.9244   | 13.4403  | 15.6184  |
| 10.5371  | 11.3710  | 14.8237  |
| 16.5785  | 18.5785  | 26.0805  |
| 29.7411  | 35.2749  | 41.4687  |
| 42.7370  | 50.9176  | 54.1738  |
| 60.5421  | 65.7904  | 67.4250  |
| 69.7361  | 78.4615  | 82.2715  |
| 88.6978  | 107.1587 | 117.1998 |
| 123.4620 | 126.9973 | 148.8968 |
| 152.4140 | 173.1224 | 186.5831 |
| 188.9500 | 198.4193 | 211.0784 |
| 220.4160 | 229.1291 | 236.8806 |
| 240.5441 | 248.0974 | 262.8973 |
| 264.8303 | 281.2436 | 308.8701 |
| 330.4984 | 355.7088 | 362.2081 |
| 368.2921 | 375.0977 | 391.9228 |
| 394.8598 | 395.2751 | 396.9414 |
| 401.1689 | 402.6570 | 404.1646 |
| 421.8574 | 442.9297 | 448.9295 |
| 466.5776 | 477.3949 | 489.3973 |
| 496.3105 | 500.5596 | 501.1792 |
| 504.6694 | 514.9496 | 521.0512 |
| 536.9563 | 539.1006 | 563.5077 |
| 572.3990 | 589.9747 | 606.9249 |
| 607.3239 | 608.7878 | 609.3020 |
| 611.2500 | 612.7333 | 613.5302 |
| 637.8328 | 651.5156 | 661.6670 |
| 677.7987 | 679.0871 | 679.8749 |
| 679.9837 | 683.0362 | 684.0309 |

|           |           |           |
|-----------|-----------|-----------|
| 687.4805  | 688.9030  | 691.6692  |
| 705.9601  | 709.5065  | 723.2981  |
| 739.8327  | 743.4338  | 743.7184  |
| 752.9870  | 756.7796  | 757.3772  |
| 772.3321  | 787.7988  | 796.7464  |
| 819.1873  | 821.8790  | 824.9078  |
| 824.9158  | 833.1073  | 833.5972  |
| 840.7025  | 873.2057  | 895.2442  |
| 895.4998  | 896.3540  | 899.1344  |
| 913.8893  | 914.7857  | 936.0612  |
| 937.9900  | 938.7307  | 938.9828  |
| 950.2354  | 952.8089  | 959.4088  |
| 960.5066  | 961.5259  | 963.7400  |
| 963.9014  | 965.0811  | 976.2001  |
| 981.9856  | 982.0938  | 982.8558  |
| 982.9949  | 984.3451  | 984.6314  |
| 984.7780  | 990.7063  | 997.6099  |
| 1026.5165 | 1026.9828 | 1030.1754 |
| 1031.1663 | 1036.4974 | 1036.9939 |
| 1074.6436 | 1076.5728 | 1076.8784 |
| 1079.2794 | 1087.0150 | 1087.6937 |
| 1101.8989 | 1103.8902 | 1150.2679 |
| 1150.7552 | 1151.0606 | 1151.4947 |
| 1152.6925 | 1152.8596 | 1160.9377 |
| 1163.5403 | 1164.4010 | 1165.9121 |
| 1175.3569 | 1176.5219 | 1178.0316 |
| 1178.3678 | 1181.6477 | 1183.9715 |
| 1206.0185 | 1257.2892 | 1261.9173 |
| 1292.3180 | 1292.4999 | 1293.6507 |
| 1304.4518 | 1308.4322 | 1309.3931 |
| 1332.0268 | 1349.5167 | 1349.5821 |
| 1351.8813 | 1356.0169 | 1357.3867 |
| 1360.6629 | 1371.3942 | 1388.7855 |
| 1396.0272 | 1422.0977 | 1431.3338 |
| 1436.7001 | 1436.9638 | 1438.5089 |
| 1441.4591 | 1442.3295 | 1444.2730 |
| 1467.3696 | 1471.3507 | 1489.5158 |
| 1494.1127 | 1496.0485 | 1500.8721 |
| 1518.4732 | 1519.7117 | 1530.3002 |
| 1541.5973 | 1571.2057 | 1571.3358 |
| 1577.0062 | 1577.5633 | 1579.7014 |
| 1580.1856 | 1606.1425 | 1606.2516 |
| 1606.3808 | 1606.9787 | 1607.5373 |
| 1608.2248 | 2227.5265 | 2228.1245 |
| 3119.4668 | 3119.9447 | 3121.7654 |
| 3122.0949 | 3122.9350 | 3123.3017 |
| 3128.2905 | 3128.3939 | 3128.6928 |
| 3128.7938 | 3132.8106 | 3133.0562 |
| 3137.6440 | 3137.7929 | 3141.0511 |
| 3141.3715 | 3143.3568 | 3143.5408 |
| 3143.5733 | 3143.7911 | 3149.3284 |
| 3149.5600 | 3154.6358 | 3154.8549 |
| 3156.9102 | 3158.0213 | 3163.5567 |
| 3166.5003 | 3168.6463 | 3169.9570 |

WSI<sub>2</sub>Co-----

|                                              |             |             |                |
|----------------------------------------------|-------------|-------------|----------------|
| Electronic Energy (au):                      |             |             | -5400.28466525 |
| Sum of electronic and zero-point Energies=   |             |             | -5399.052552   |
| Sum of electronic and thermal Energies=      |             |             | -5398.965205   |
| Sum of electronic and thermal Enthalpies=    |             |             | -5398.964261   |
| Sum of electronic and thermal Free Energies= |             |             | -5399.197758   |
| Optimized geometry                           |             |             |                |
| C                                            | 0.83831200  | -2.72094200 | -0.67611900    |
| N                                            | 1.10255900  | -1.34995100 | -0.85917200    |
| N                                            | -1.23967000 | -1.24129000 | 0.89813800     |
| C                                            | -1.12871900 | -2.62701000 | 0.67492500     |
| N                                            | -0.17795200 | -3.25565600 | -0.00811400    |
| C                                            | -2.39672200 | -1.03424800 | 1.57446300     |
| C                                            | -3.08238600 | -2.29186800 | 1.80546600     |
| C                                            | -2.26852100 | -3.30795800 | 1.25345300     |
| C                                            | 1.89484400  | -3.50818200 | -1.27980200    |
| C                                            | 2.81951900  | -2.57222600 | -1.79783100    |
| C                                            | 2.27776300  | -1.25405000 | -1.52735800    |
| C                                            | -0.83823400 | 2.72106600  | -0.67616200    |
| N                                            | -1.10248600 | 1.35008400  | -0.85927800    |
| N                                            | 1.23947100  | 1.24133200  | 0.89833800     |
| C                                            | 1.12873700  | 2.62704400  | 0.67494200     |
| N                                            | 0.17804600  | 3.25574400  | -0.00814800    |
| C                                            | 2.39646800  | 1.03420100  | 1.57472500     |
| C                                            | 3.08234000  | 2.29174300  | 1.80554400     |
| C                                            | 2.26864700  | 3.30788700  | 1.25337800     |
| C                                            | -1.89477100 | 3.50833500  | -1.27978900    |
| C                                            | -2.81945700 | 2.57240800  | -1.79785300    |
| C                                            | -2.27770100 | 1.25421800  | -1.52745300    |
| C                                            | 2.82729600  | -0.28899000 | 2.03398600     |
| C                                            | 4.19838500  | -0.63953100 | 2.03871800     |
| C                                            | 1.88222500  | -1.24257400 | 2.47872600     |
| C                                            | 4.60407400  | -1.90861100 | 2.46662300     |
| H                                            | 4.93807100  | 0.08045500  | 1.68198500     |
| C                                            | 2.29394100  | -2.50730300 | 2.91129500     |
| H                                            | 0.82199900  | -0.97687600 | 2.50588500     |
| C                                            | 3.65602900  | -2.84633700 | 2.90498000     |
| H                                            | 5.66632300  | -2.16995600 | 2.44948500     |
| H                                            | 1.54854200  | -3.22867600 | 3.25869000     |
| H                                            | 3.97669400  | -3.83685300 | 3.24033000     |
| C                                            | 2.52556300  | 4.74998900  | 1.24468100     |
| C                                            | 1.46845100  | 5.68867400  | 1.33648700     |
| C                                            | 3.85146600  | 5.24082200  | 1.15279400     |
| C                                            | 1.73321500  | 7.06290800  | 1.34217500     |
| H                                            | 0.44061100  | 5.32776400  | 1.40257000     |
| C                                            | 4.10935900  | 6.61570700  | 1.15730900     |
| H                                            | 4.67770200  | 4.53242200  | 1.05742900     |
| C                                            | 3.05225800  | 7.53422100  | 1.25481300     |
| H                                            | 0.90121800  | 7.76963400  | 1.41732100     |
| H                                            | 5.14079600  | 6.97229500  | 1.07592600     |
| H                                            | 3.25521600  | 8.60934400  | 1.26087800     |
| C                                            | -1.98180800 | 4.96959200  | -1.32806500    |
| C                                            | -0.81990700 | 5.77416000  | -1.43063300    |
| C                                            | -3.24218100 | 5.61610100  | -1.28685300    |
| C                                            | -0.92009600 | 7.16834100  | -1.49450900    |
| H                                            | 0.15919100  | 5.29304600  | -1.45878600    |
| C                                            | -3.33550300 | 7.01029700  | -1.35021600    |
| H                                            | -4.14861500 | 5.01464900  | -1.18600300    |
| C                                            | -2.17579700 | 7.79417300  | -1.45685900    |
| H                                            | -0.00890000 | 7.76869300  | -1.57587600    |

|   |             |             |             |
|---|-------------|-------------|-------------|
| H | -4.31907800 | 7.48825300  | -1.30784400 |
| H | -2.25061000 | 8.88451200  | -1.50868000 |
| C | -2.86309400 | -0.02427700 | -1.94216600 |
| C | -2.04644000 | -1.07672300 | -2.41621800 |
| C | -4.26148400 | -0.22824400 | -1.86992100 |
| C | -2.61026400 | -2.29788000 | -2.80119100 |
| H | -0.96752900 | -0.92292600 | -2.50647500 |
| C | -4.81881900 | -1.45507000 | -2.24782100 |
| H | -4.90178800 | 0.57151800  | -1.49111300 |
| C | -3.99744400 | -2.49325700 | -2.71455300 |
| H | -1.96331600 | -3.09853300 | -3.17130700 |
| H | -5.89984400 | -1.60420500 | -2.16950400 |
| H | -4.43632300 | -3.45053400 | -3.01029500 |
| C | 1.98188900  | -4.96943500 | -1.32815400 |
| C | 3.24227300  | -5.61593300 | -1.28705200 |
| C | 0.81999500  | -5.77401600 | -1.43070300 |
| C | 3.33561000  | -7.01012300 | -1.35049100 |
| H | 4.14870700  | -5.01447800 | -1.18622500 |
| C | 0.92019900  | -7.16819200 | -1.49465500 |
| H | -0.15911200 | -5.29291500 | -1.45877900 |
| C | 2.17591000  | -7.79401100 | -1.45710700 |
| H | 4.31919500  | -7.48806600 | -1.30820200 |
| H | 0.00900500  | -7.76854900 | -1.57600000 |
| H | 2.25073400  | -8.88434700 | -1.50899200 |
| C | 2.86319600  | 0.02446000  | -1.94197600 |
| C | 2.04658700  | 1.07694200  | -2.41602400 |
| C | 4.26158600  | 0.22840000  | -1.86964900 |
| C | 2.61045300  | 2.29810500  | -2.80091600 |
| H | 0.96767800  | 0.92316800  | -2.50634300 |
| C | 4.81896200  | 1.45523300  | -2.24746400 |
| H | 4.90185800  | -0.57139000 | -1.49084700 |
| C | 3.99763100  | 2.49345500  | -2.71419600 |
| H | 1.96353800  | 3.09878600  | -3.17102900 |
| H | 5.89986000  | 1.60434500  | -2.16908100 |
| H | 4.43654300  | 3.45073800  | -3.00987300 |
| C | -2.82782500 | 0.28894300  | 2.03345800  |
| C | -1.88296200 | 1.24281000  | 2.47803800  |
| C | -4.19898200 | 0.63921600  | 2.03805300  |
| C | -2.29494500 | 2.50754800  | 2.91032500  |
| H | -0.82268100 | 0.97733200  | 2.50529100  |
| C | -4.60494000 | 1.90830600  | 2.46567500  |
| H | -4.93850900 | -0.08098800 | 1.68143100  |
| C | -3.65710000 | 2.84631100  | 2.90388100  |
| H | -1.54970200 | 3.22914300  | 3.25759400  |
| H | -5.66724000 | 2.16943600  | 2.44843400  |
| H | -3.97797700 | 3.83683300  | 3.23900800  |
| C | -2.52520800 | -4.75010100 | 1.24494600  |
| C | -1.46795300 | -5.68860700 | 1.33694600  |
| C | -3.85102800 | -5.24115500 | 1.15305400  |
| C | -1.73250200 | -7.06288200 | 1.34280100  |
| H | -0.44017300 | -5.32752800 | 1.40305200  |
| C | -4.10870600 | -6.61607900 | 1.15773400  |
| H | -4.67736900 | -4.53289200 | 1.05755900  |
| C | -3.05146500 | -7.53441300 | 1.25541700  |
| H | -0.90040100 | -7.76946900 | 1.41809300  |
| H | -5.14008400 | -6.97283900 | 1.07634000  |
| H | -3.25425400 | -8.60956700 | 1.26161300  |
| C | -4.26085900 | -2.44995400 | 2.55987300  |
| C | 3.97887700  | -2.82480900 | -2.55607500 |
| C | 4.98791000  | -3.02623600 | -3.23451100 |
| C | -5.28342100 | -2.58871300 | 3.23370800  |

|    |             |             |             |
|----|-------------|-------------|-------------|
| C  | 6.15251500  | -3.25266800 | -4.01554400 |
| C  | 6.57207200  | -4.57293300 | -4.32372100 |
| C  | 6.91692200  | -2.15932000 | -4.50031300 |
| C  | 7.72084800  | -4.78586900 | -5.09102400 |
| H  | 5.98318200  | -5.41719700 | -3.95491000 |
| C  | 8.06384600  | -2.38650900 | -5.26617700 |
| H  | 6.59385200  | -1.14088400 | -4.26738400 |
| C  | 8.47087300  | -3.69709700 | -5.56480900 |
| H  | 8.03320000  | -5.80844300 | -5.32269400 |
| H  | 8.64413100  | -1.53538600 | -5.63465300 |
| H  | 9.36841300  | -3.86918500 | -6.16576100 |
| C  | -6.46298500 | -2.75326000 | 4.00782800  |
| C  | -6.99944800 | -4.04702000 | 4.23791700  |
| C  | -7.12569100 | -1.62756700 | 4.56278400  |
| C  | -8.16235300 | -4.20253300 | 4.99756100  |
| H  | -6.48876900 | -4.91653500 | 3.81505900  |
| C  | -8.28797100 | -1.79734200 | 5.32041500  |
| H  | -6.71268900 | -0.62977200 | 4.39069700  |
| C  | -8.81131200 | -3.08183600 | 5.54103700  |
| H  | -8.56524800 | -5.20522600 | 5.16841800  |
| H  | -8.78913700 | -0.92170300 | 5.74347000  |
| H  | -9.72043600 | -3.20909500 | 6.13569200  |
| C  | 4.26083200  | 2.44973100  | 2.55994200  |
| C  | 5.28340700  | 2.58840300  | 3.23377500  |
| C  | 6.46300600  | 2.75281200  | 4.00787000  |
| C  | 6.99972800  | 4.04649600  | 4.23779000  |
| C  | 7.12549200  | 1.62705900  | 4.56296500  |
| C  | 8.16267000  | 4.20187400  | 4.99740200  |
| H  | 6.48921700  | 4.91605800  | 3.81482400  |
| C  | 8.28781400  | 1.79669900  | 5.32056300  |
| H  | 6.71228900  | 0.62932400  | 4.39101100  |
| C  | 8.81141300  | 3.08111800  | 5.54101500  |
| H  | 8.56576800  | 5.20450900  | 5.16812600  |
| H  | 8.78880900  | 0.92101600  | 5.74372600  |
| H  | 9.72056800  | 3.20827200  | 6.13564500  |
| C  | -3.97883700 | 2.82504200  | -2.55604800 |
| C  | -4.98789400 | 3.02651100  | -3.23443700 |
| C  | -6.15253500 | 3.25295600  | -4.01541200 |
| C  | -6.57215300 | 4.57322600  | -4.32347600 |
| C  | -6.91691900 | 2.15961300  | -4.50023200 |
| C  | -7.72096500 | 4.78617500  | -5.09072300 |
| H  | -5.98328300 | 5.41748500  | -3.95462200 |
| C  | -8.06387800 | 2.38681400  | -5.26603900 |
| H  | -6.59380200 | 1.14117300  | -4.26738800 |
| C  | -8.47096500 | 3.69740900  | -5.56456100 |
| H  | -8.03336400 | 5.80875400  | -5.32230600 |
| H  | -8.64414500 | 1.53569600  | -5.63455600 |
| H  | -9.36853300 | 3.86950800  | -6.16546900 |
| Co | -0.00005200 | 0.00003900  | 0.02913800  |

Frequencies (cm<sup>-1</sup>):

|         |         |         |
|---------|---------|---------|
| 6.1364  | 6.1495  | 8.5514  |
| 9.6947  | 10.3835 | 10.6268 |
| 12.2931 | 13.8106 | 18.2814 |
| 19.2205 | 19.6671 | 21.0549 |
| 23.7718 | 23.8955 | 26.4870 |
| 27.4880 | 27.9974 | 28.0545 |
| 32.7449 | 39.9439 | 42.1548 |
| 44.1619 | 47.4022 | 49.7881 |
| 49.9195 | 51.4458 | 53.1539 |
| 55.1460 | 56.5115 | 58.7059 |
| 60.9954 | 63.4297 | 65.7029 |

|          |          |          |
|----------|----------|----------|
| 66.9994  | 71.8865  | 71.9053  |
| 76.3979  | 77.2199  | 77.9079  |
| 79.2132  | 100.8080 | 101.0497 |
| 105.6800 | 109.1559 | 110.8423 |
| 116.8986 | 117.6733 | 118.2757 |
| 131.0953 | 138.4013 | 139.8065 |
| 142.5098 | 145.6865 | 150.9185 |
| 166.7774 | 188.0698 | 191.7011 |
| 195.5435 | 199.6580 | 203.6734 |
| 208.5382 | 212.1180 | 212.7736 |
| 216.0115 | 218.6347 | 226.0278 |
| 227.3113 | 227.3458 | 228.6255 |
| 234.6017 | 240.8731 | 243.2102 |
| 261.2874 | 266.9282 | 269.2541 |
| 286.6573 | 296.8181 | 313.8333 |
| 321.5082 | 334.0778 | 334.2690 |
| 339.7355 | 341.7059 | 354.0880 |
| 354.7113 | 361.5818 | 361.7821 |
| 378.8593 | 384.7772 | 387.4445 |
| 393.2901 | 395.1651 | 395.1658 |
| 395.4535 | 395.4553 | 397.2976 |
| 398.2023 | 398.6046 | 399.4707 |
| 399.9882 | 400.4953 | 404.6371 |
| 405.1254 | 417.8745 | 418.5075 |
| 439.1226 | 441.2706 | 443.7498 |
| 448.7730 | 465.9176 | 466.0346 |
| 480.6363 | 483.8019 | 488.4080 |
| 489.9962 | 496.5579 | 496.6195 |
| 496.9768 | 497.1519 | 502.2654 |
| 502.9761 | 504.0289 | 504.2321 |
| 517.8383 | 518.8308 | 534.2901 |
| 534.2922 | 539.5139 | 539.5293 |
| 566.4209 | 566.7374 | 591.7290 |
| 591.7335 | 595.7690 | 596.8533 |
| 608.0204 | 608.3421 | 608.5691 |
| 608.8445 | 608.8983 | 609.1897 |
| 609.5753 | 609.5776 | 613.1065 |
| 613.1089 | 613.4134 | 613.4178 |
| 641.6359 | 642.9469 | 661.0605 |
| 661.1163 | 664.3307 | 666.8080 |
| 670.2578 | 671.3760 | 677.5788 |
| 678.3681 | 678.4533 | 679.3960 |
| 679.8900 | 679.9801 | 680.2632 |
| 680.3110 | 680.5651 | 680.5765 |
| 680.8567 | 680.8590 | 684.9004 |
| 685.3705 | 688.8690 | 689.1883 |
| 703.3973 | 703.4753 | 706.6075 |
| 706.6469 | 713.1107 | 713.5676 |
| 735.6126 | 735.8685 | 742.8482 |
| 742.8663 | 743.0904 | 743.1015 |
| 755.3986 | 755.4336 | 756.2275 |
| 756.3204 | 758.1933 | 758.5303 |
| 767.8889 | 767.9848 | 793.0680 |
| 793.0799 | 813.2059 | 813.7789 |
| 814.3113 | 815.5629 | 816.5107 |
| 817.3063 | 818.1876 | 820.3090 |
| 821.3941 | 821.4955 | 824.6282 |
| 824.6330 | 824.7544 | 824.7721 |
| 840.2499 | 840.2884 | 868.4458 |
| 868.7483 | 889.6792 | 891.4107 |
| 892.5754 | 892.7542 | 892.8115 |

|           |           |           |
|-----------|-----------|-----------|
| 893.3060  | 893.3242  | 893.3677  |
| 893.4909  | 894.7301  | 895.0061  |
| 895.4408  | 931.5872  | 931.6338  |
| 932.8428  | 934.2503  | 934.5426  |
| 934.6524  | 934.8670  | 936.1998  |
| 937.7186  | 937.7196  | 937.9441  |
| 937.9444  | 954.9245  | 954.9268  |
| 956.7057  | 956.7214  | 959.6639  |
| 960.0537  | 960.3496  | 960.7921  |
| 962.2546  | 962.2562  | 962.5500  |
| 962.5513  | 973.1987  | 973.5889  |
| 976.9821  | 977.6171  | 981.8140  |
| 981.8149  | 981.9146  | 981.9152  |
| 982.8753  | 983.2342  | 983.2979  |
| 983.6875  | 984.3879  | 984.4555  |
| 984.7969  | 984.8887  | 1018.5681 |
| 1019.7698 | 1025.2575 | 1025.2622 |
| 1026.6234 | 1026.9803 | 1027.2692 |
| 1027.9369 | 1033.0205 | 1033.1816 |
| 1033.5294 | 1033.7476 | 1039.1009 |
| 1040.4978 | 1055.4574 | 1055.5528 |
| 1076.2572 | 1076.2584 | 1076.5393 |
| 1076.5404 | 1079.5186 | 1080.1197 |
| 1082.2948 | 1083.6462 | 1085.0342 |
| 1085.1279 | 1089.3959 | 1089.5116 |
| 1149.2089 | 1149.2231 | 1149.5548 |
| 1149.5772 | 1149.7994 | 1149.8017 |
| 1149.8831 | 1149.8856 | 1150.5598 |
| 1150.8496 | 1151.0026 | 1151.1267 |
| 1151.6525 | 1151.7507 | 1157.3533 |
| 1157.5153 | 1158.3162 | 1159.0413 |
| 1167.9081 | 1168.5907 | 1168.6890 |
| 1169.7041 | 1170.0215 | 1171.0056 |
| 1171.3008 | 1172.6517 | 1174.0845 |
| 1174.1657 | 1174.9501 | 1174.9986 |
| 1179.7715 | 1180.3031 | 1250.8370 |
| 1251.1407 | 1252.3666 | 1253.1253 |
| 1269.7356 | 1271.7782 | 1288.1294 |
| 1290.8830 | 1291.4775 | 1291.4940 |
| 1291.5703 | 1291.9061 | 1300.6631 |
| 1300.7455 | 1305.7432 | 1305.7673 |
| 1310.2146 | 1311.6999 | 1328.3925 |
| 1333.1814 | 1349.1470 | 1349.1473 |
| 1349.1575 | 1349.1595 | 1354.9934 |
| 1355.0039 | 1355.5795 | 1355.6164 |
| 1359.8092 | 1359.9354 | 1360.7325 |
| 1361.6402 | 1377.5500 | 1378.1404 |
| 1388.2546 | 1388.3012 | 1414.3744 |
| 1415.1945 | 1421.0932 | 1421.8962 |
| 1431.6695 | 1431.8998 | 1435.7145 |
| 1435.7241 | 1437.2021 | 1437.2055 |
| 1437.3480 | 1437.3649 | 1439.9290 |
| 1440.0070 | 1440.3193 | 1440.6407 |
| 1464.8966 | 1465.1587 | 1467.1901 |
| 1467.1981 | 1474.9980 | 1476.0055 |
| 1492.4734 | 1492.6268 | 1494.2351 |
| 1494.8701 | 1495.0092 | 1495.4138 |
| 1500.5420 | 1501.7791 | 1520.5723 |
| 1520.6820 | 1522.4838 | 1522.6106 |
| 1556.6391 | 1557.5860 | 1570.8092 |
| 1570.8094 | 1570.8199 | 1570.8201 |

|           |           |           |
|-----------|-----------|-----------|
| 1576.7004 | 1576.7590 | 1577.0044 |
| 1577.0944 | 1580.0352 | 1580.1882 |
| 1580.8035 | 1580.9176 | 1604.6115 |
| 1604.8916 | 1605.6988 | 1605.7253 |
| 1605.7273 | 1605.9552 | 1606.5581 |
| 1606.5649 | 1606.6737 | 1606.7338 |
| 1607.1997 | 1607.2049 | 2222.6307 |
| 2222.8317 | 2223.3830 | 2223.3892 |
| 3116.6752 | 3116.6769 | 3117.0882 |
| 3117.0930 | 3120.1973 | 3120.1994 |
| 3120.2392 | 3120.2427 | 3121.1160 |
| 3121.2122 | 3121.5430 | 3121.8756 |
| 3125.3923 | 3125.3944 | 3126.2441 |
| 3126.2444 | 3126.8499 | 3126.8506 |
| 3126.9434 | 3126.9459 | 3128.0356 |
| 3128.1316 | 3128.4112 | 3129.1037 |
| 3136.3553 | 3136.3598 | 3136.4704 |
| 3136.4784 | 3136.6681 | 3136.7124 |
| 3137.4205 | 3138.2318 | 3138.6049 |
| 3138.6079 | 3138.9399 | 3138.9683 |
| 3142.1280 | 3142.1310 | 3142.2834 |
| 3142.2869 | 3145.4476 | 3145.6505 |
| 3145.8731 | 3146.1412 | 3148.1093 |
| 3148.1136 | 3148.1881 | 3148.2011 |
| 3149.7641 | 3149.7666 | 3151.0928 |
| 3151.1041 | 3154.2260 | 3154.2421 |
| 3154.8571 | 3154.9113 | 3164.0032 |
| 3164.0072 | 3164.6766 | 3164.6830 |



WSI<sub>2</sub>Ni-----

|                                              |             |             |                |
|----------------------------------------------|-------------|-------------|----------------|
| Electronic Energy (au):                      |             |             | -5525.78152372 |
| Sum of electronic and zero-point Energies=   |             |             | -5524.548692   |
| Sum of electronic and thermal Energies=      |             |             | -5524.461695   |
| Sum of electronic and thermal Enthalpies=    |             |             | -5524.460751   |
| Sum of electronic and thermal Free Energies= |             |             | -5524.689577   |
| Optimized geometry                           |             |             |                |
| C                                            | -0.54470700 | -2.74772500 | 0.63072100     |
| N                                            | -0.92168200 | -1.39450800 | 0.74612300     |
| N                                            | 1.41067600  | -1.16336200 | -0.91749000    |
| C                                            | 1.42760700  | -2.54321200 | -0.67967900    |
| N                                            | 0.51933300  | -3.23361800 | 0.00199200     |
| C                                            | 2.54831700  | -0.85570300 | -1.58522300    |
| C                                            | 3.34763000  | -2.04736900 | -1.80172200    |
| C                                            | 2.62623700  | -3.12890200 | -1.24209400    |
| C                                            | -1.53331300 | -3.58868900 | 1.27557200     |
| C                                            | -2.52332500 | -2.70649900 | 1.76320400     |
| C                                            | -2.08711500 | -1.36134400 | 1.43476300     |
| C                                            | 0.54469100  | 2.74780800  | 0.63066000     |
| N                                            | 0.92159400  | 1.39458600  | 0.74621600     |
| N                                            | -1.41060800 | 1.16333000  | -0.91756200    |
| C                                            | -1.42757400 | 2.54319600  | -0.67979400    |
| N                                            | -0.51933300 | 3.23365500  | 0.00186200     |
| C                                            | -2.54824100 | 0.85562400  | -1.58527300    |
| C                                            | -3.34759800 | 2.04726400  | -1.80179800    |
| C                                            | -2.62622800 | 3.12883200  | -1.24222400    |
| C                                            | 1.53332200  | 3.58879100  | 1.27543500     |
| C                                            | 2.52330200  | 2.70660400  | 1.76315300     |
| C                                            | 2.08703600  | 1.36144000  | 1.43484800     |
| C                                            | -2.85282400 | -0.50115700 | -2.04615800    |
| C                                            | -4.18084100 | -0.98911200 | -2.04629900    |
| C                                            | -1.81803800 | -1.35544800 | -2.49373000    |
| C                                            | -4.45600900 | -2.29430400 | -2.46988400    |
| H                                            | -4.98888000 | -0.34704800 | -1.68925500    |
| C                                            | -2.09807500 | -2.65766400 | -2.91959900    |
| H                                            | -0.79042200 | -0.98047500 | -2.53539400    |
| C                                            | -3.41888200 | -3.13291400 | -2.90739300    |
| H                                            | -5.48612900 | -2.66220500 | -2.44968600    |
| H                                            | -1.28425100 | -3.29993000 | -3.26839200    |
| H                                            | -3.63822600 | -4.15210300 | -3.23815700    |
| C                                            | -3.00013500 | 4.54448100  | -1.22859700    |
| C                                            | -2.01955800 | 5.56546100  | -1.29392900    |
| C                                            | -4.36230500 | 4.92801900  | -1.15503700    |
| C                                            | -2.39166100 | 6.91433700  | -1.28988300    |
| H                                            | -0.96556000 | 5.28752300  | -1.34736900    |
| C                                            | -4.72751400 | 6.27827900  | -1.15062900    |
| H                                            | -5.13173800 | 4.15612300  | -1.08011500    |
| C                                            | -3.74519900 | 7.27876600  | -1.22073600    |
| H                                            | -1.61705100 | 7.68530000  | -1.34426000    |
| H                                            | -5.78512500 | 6.55159600  | -1.08377800    |
| H                                            | -4.03305800 | 8.33436100  | -1.21994000    |
| C                                            | 1.50569500  | 5.04946600  | 1.38393800     |
| C                                            | 0.28448400  | 5.75755500  | 1.50872300     |
| C                                            | 2.71242400  | 5.79233800  | 1.37956300     |
| C                                            | 0.27645400  | 7.15182600  | 1.62655700     |
| H                                            | -0.65446900 | 5.20156700  | 1.51064200     |
| C                                            | 2.69738400  | 7.18612100  | 1.49777600     |
| H                                            | 3.66331700  | 5.26709000  | 1.26376200     |
| C                                            | 1.48004500  | 7.87370600  | 1.62344500     |
| H                                            | -0.67881800 | 7.67662200  | 1.72379900     |

|    |             |             |             |
|----|-------------|-------------|-------------|
| H  | 3.64143700  | 7.73948100  | 1.48339400  |
| H  | 1.46996800  | 8.96375000  | 1.71730000  |
| C  | 2.77061200  | 0.12960800  | 1.84703800  |
| C  | 2.05135700  | -0.95613200 | 2.39522200  |
| C  | 4.17619500  | 0.02439300  | 1.72540900  |
| C  | 2.71892000  | -2.11605600 | 2.80437500  |
| H  | 0.96890600  | -0.87658800 | 2.52134200  |
| C  | 4.83663300  | -1.14337700 | 2.12381200  |
| H  | 4.74028000  | 0.85300900  | 1.29095100  |
| C  | 4.11177900  | -2.21635300 | 2.66580300  |
| H  | 2.14805500  | -2.94455100 | 3.23380700  |
| H  | 5.92170600  | -1.21813000 | 2.00515800  |
| H  | 4.63032300  | -3.12694000 | 2.97959600  |
| C  | -1.50562700 | -5.04935400 | 1.38419900  |
| C  | -2.71232400 | -5.79227800 | 1.37982000  |
| C  | -0.28439000 | -5.75737600 | 1.50910400  |
| C  | -2.69722800 | -7.18605100 | 1.49814200  |
| H  | -3.66323300 | -5.26707800 | 1.26392900  |
| C  | -0.27630500 | -7.15163700 | 1.62704700  |
| H  | 0.65453600  | -5.20134300 | 1.51103000  |
| C  | -1.47986400 | -7.87357000 | 1.62392700  |
| H  | -3.64125500 | -7.73945500 | 1.48375100  |
| H  | 0.67898500  | -7.67638500 | 1.72437900  |
| H  | -1.46974200 | -8.96360700 | 1.71786600  |
| C  | -2.77074500 | -0.12951700 | 1.84687500  |
| C  | -2.05152700 | 0.95633700  | 2.39488500  |
| C  | -4.17634900 | -0.02442200 | 1.72537700  |
| C  | -2.71914200 | 2.11624300  | 2.80400200  |
| H  | -0.96905400 | 0.87690300  | 2.52088700  |
| C  | -4.83684300 | 1.14332700  | 2.12375000  |
| H  | -4.74041600 | -0.85311800 | 1.29104800  |
| C  | -4.11202500 | 2.21641200  | 2.66557300  |
| H  | -2.14829600 | 2.94482500  | 3.23328900  |
| H  | -5.92193400 | 1.21797500  | 2.00519900  |
| H  | -4.63061200 | 3.12698400  | 2.97933900  |
| C  | 2.85294200  | 0.50107400  | -2.04608300 |
| C  | 1.81817300  | 1.35542300  | -2.49358300 |
| C  | 4.18097800  | 0.98898000  | -2.04625200 |
| C  | 2.09824100  | 2.65764800  | -2.91940400 |
| H  | 0.79054100  | 0.98049000  | -2.53522800 |
| C  | 4.45617800  | 2.29417900  | -2.46979500 |
| H  | 4.98900700  | 0.34687200  | -1.68926400 |
| C  | 3.41906600  | 3.13284800  | -2.90722800 |
| H  | 1.28442600  | 3.29995800  | -3.26813500 |
| H  | 5.48631300  | 2.66204000  | -2.44962000 |
| H  | 3.63843700  | 4.15204300  | -3.23795500 |
| C  | 3.00011000  | -4.54455700 | -1.22841400 |
| C  | 2.01950600  | -5.56551800 | -1.29365600 |
| C  | 4.36227300  | -4.92812400 | -1.15487600 |
| C  | 2.39157800  | -6.91440300 | -1.28955000 |
| H  | 0.96551300  | -5.28755700 | -1.34707500 |
| C  | 4.72745000  | -6.27839200 | -1.15040800 |
| H  | 5.13172700  | -4.15624200 | -1.08001800 |
| C  | 3.74510900  | -7.27886000 | -1.22043000 |
| H  | 1.61694700  | -7.68535000 | -1.34385700 |
| H  | 5.78505800  | -6.55173000 | -1.08357600 |
| H  | 4.03294300  | -8.33446200 | -1.21958700 |
| Ni | 0.00006200  | 0.00002000  | -0.25069900 |
| C  | 4.54123800  | -2.09856300 | -2.54631000 |
| C  | -3.65767100 | -3.01202300 | 2.53876800  |
| C  | -4.64913700 | -3.25701800 | 3.22867700  |

|   |              |             |             |
|---|--------------|-------------|-------------|
| C | 5.57843600   | -2.13595500 | -3.21132200 |
| C | -5.79637700  | -3.53126400 | 4.01973400  |
| C | -6.12962600  | -4.86396700 | 4.37599800  |
| C | -6.63123400  | -2.47304000 | 4.46468200  |
| C | -7.26391400  | -5.12322600 | 5.15060700  |
| H | -5.48633000  | -5.68100000 | 4.03797700  |
| C | -7.76264500  | -2.74650400 | 5.23846000  |
| H | -6.37465600  | -1.44503400 | 4.19394100  |
| C | -8.08445000  | -4.06916700 | 5.58430400  |
| H | -7.50961400  | -6.15490200 | 5.41928800  |
| H | -8.39790200  | -1.92215400 | 5.57583700  |
| H | -8.97039300  | -4.27747300 | 6.19099000  |
| C | 6.77670700   | -2.17989100 | -3.97268300 |
| C | 7.46076400   | -3.40743300 | -4.17181300 |
| C | 7.31193100   | -0.99614300 | -4.54439000 |
| C | 8.64294800   | -3.44209600 | -4.91672300 |
| H | 7.04848700   | -4.32200000 | -3.73679600 |
| C | 8.49481900   | -1.04506100 | -5.28734600 |
| H | 6.78516200   | -0.04941800 | -4.39611800 |
| C | 9.16514700   | -2.26462100 | -5.47650100 |
| H | 9.16062000   | -4.39467100 | -5.06336800 |
| H | 8.89669200   | -0.12562900 | -5.72327000 |
| H | 10.09001300  | -2.29768100 | -6.05946300 |
| C | -4.54121600  | 2.09839800  | -2.54637400 |
| C | -5.57843500  | 2.13572900  | -3.21135600 |
| C | -6.77671400  | 2.17955800  | -3.97271200 |
| C | -7.46084400  | 3.40704900  | -4.17189600 |
| C | -7.31187000  | 0.99575100  | -4.54435900 |
| C | -8.64303400  | 3.44160600  | -4.91680100 |
| H | -7.04861900  | 4.32166200  | -3.73692700 |
| C | -8.49476500  | 1.04456300  | -5.28731100 |
| H | -6.78504300  | 0.04906500  | -4.39604500 |
| C | -9.16516700  | 2.26407400  | -5.47652000 |
| H | -9.16076300  | 4.39414500  | -5.06348900 |
| H | -8.89658600  | 0.12508700  | -5.72318900 |
| H | -10.09003700 | 2.29705200  | -6.05947900 |
| C | 3.65765700   | 3.01212800  | 2.53870400  |
| C | 4.64913900   | 3.25713300  | 3.22858700  |
| C | 5.79635000   | 3.53151000  | 4.01964100  |
| C | 6.12954800   | 4.86426700  | 4.37575000  |
| C | 6.63122400   | 2.47336600  | 4.46474500  |
| C | 7.26380100   | 5.12365600  | 5.15036600  |
| H | 5.48624000   | 5.68123900  | 4.03760800  |
| C | 7.76260000   | 2.74695900  | 5.23852800  |
| H | 6.37468500   | 1.44531800  | 4.19412200  |
| C | 8.08435300   | 4.06967300  | 5.58422200  |
| H | 7.50946200   | 6.15537200  | 5.41893000  |
| H | 8.39787000   | 1.92266800  | 5.57602800  |
| H | 8.97026800   | 4.27808000  | 6.19091400  |

Frequencies (cm<sup>-1</sup>):

|         |         |         |
|---------|---------|---------|
| 7.5899  | 9.1121  | 10.5463 |
| 10.7015 | 13.7567 | 14.1478 |
| 15.2052 | 16.0693 | 19.7910 |
| 21.0948 | 21.1265 | 22.3747 |
| 28.1665 | 28.6831 | 31.0251 |
| 31.1080 | 31.9231 | 32.0771 |
| 36.1949 | 44.6451 | 45.0422 |
| 49.9269 | 51.3660 | 51.8985 |
| 52.6360 | 55.5028 | 57.3196 |
| 58.6949 | 61.9541 | 64.2203 |
| 64.3912 | 67.1950 | 71.2328 |

|          |          |          |
|----------|----------|----------|
| 74.1287  | 74.7115  | 76.8406  |
| 78.9631  | 79.0108  | 79.2525  |
| 81.2716  | 99.0567  | 102.5077 |
| 106.5733 | 110.7070 | 111.4947 |
| 116.2748 | 117.2215 | 120.1637 |
| 132.1151 | 139.4269 | 141.0920 |
| 142.3246 | 146.5635 | 152.0384 |
| 168.7721 | 186.7732 | 192.0618 |
| 193.4883 | 199.4265 | 204.9009 |
| 208.2289 | 213.2204 | 213.5751 |
| 216.0314 | 218.2998 | 225.9809 |
| 226.9955 | 227.0767 | 228.5918 |
| 233.9505 | 239.3752 | 242.3128 |
| 264.5539 | 265.1223 | 270.3780 |
| 285.2318 | 293.2623 | 312.9058 |
| 322.4170 | 334.0094 | 334.2675 |
| 339.4847 | 340.3815 | 353.1354 |
| 354.5556 | 362.5788 | 362.8308 |
| 380.2392 | 386.0920 | 387.3513 |
| 391.6177 | 395.5917 | 395.5928 |
| 395.9049 | 395.9051 | 399.1435 |
| 399.3176 | 399.8072 | 401.3995 |
| 401.6931 | 402.5482 | 404.7501 |
| 405.8452 | 415.9635 | 417.7288 |
| 440.4812 | 442.1926 | 446.5405 |
| 450.6968 | 467.3926 | 468.0119 |
| 480.9799 | 483.3108 | 488.8680 |
| 489.6565 | 496.8726 | 496.8956 |
| 498.0287 | 498.1880 | 503.4100 |
| 503.6159 | 504.2309 | 504.4783 |
| 518.3411 | 518.5187 | 535.7561 |
| 535.7765 | 540.8318 | 540.9348 |
| 566.2953 | 566.8050 | 591.2241 |
| 591.2484 | 596.5565 | 597.5358 |
| 608.0363 | 608.3070 | 608.6031 |
| 609.0800 | 609.1291 | 609.3070 |
| 610.1184 | 610.1314 | 613.2401 |
| 613.2414 | 613.4261 | 613.4317 |
| 642.9460 | 643.5645 | 661.4049 |
| 661.6017 | 663.7550 | 665.8567 |
| 670.3087 | 670.3907 | 678.7461 |
| 678.8859 | 680.0159 | 680.2113 |
| 680.5392 | 680.5711 | 680.6158 |
| 680.8520 | 681.3288 | 682.6529 |
| 683.7492 | 683.9574 | 685.3767 |
| 686.0353 | 689.5611 | 690.0830 |
| 704.0389 | 705.4266 | 706.6224 |
| 707.4202 | 713.2027 | 714.0055 |
| 734.8329 | 734.8481 | 742.5910 |
| 742.6046 | 743.1357 | 743.1541 |
| 754.7066 | 755.2736 | 756.0819 |
| 756.5802 | 758.3823 | 758.6422 |
| 768.3748 | 768.3973 | 792.9650 |
| 792.9928 | 817.1546 | 817.6101 |
| 817.8311 | 818.0725 | 818.1265 |
| 819.8263 | 821.2939 | 822.3358 |
| 822.6309 | 824.0399 | 824.4535 |
| 824.5020 | 825.1855 | 825.3791 |
| 841.0873 | 842.6809 | 867.2073 |
| 868.1841 | 892.9528 | 893.0510 |
| 893.2069 | 893.4359 | 893.6098 |

|           |           |           |
|-----------|-----------|-----------|
| 893.7520  | 893.8294  | 895.1568  |
| 895.3449  | 895.4470  | 896.5009  |
| 899.2960  | 932.5225  | 932.5266  |
| 934.6229  | 935.4800  | 935.6721  |
| 936.3130  | 936.5486  | 937.5727  |
| 937.5737  | 938.2007  | 938.2023  |
| 938.5504  | 955.7964  | 955.8003  |
| 957.7513  | 957.7835  | 959.7918  |
| 960.4600  | 960.9697  | 961.4287  |
| 962.1145  | 962.1157  | 962.5125  |
| 962.5146  | 972.5156  | 972.8336  |
| 979.6903  | 980.2086  | 981.9318  |
| 981.9374  | 981.9734  | 981.9742  |
| 983.0127  | 983.2909  | 983.4008  |
| 983.7813  | 984.5198  | 984.8868  |
| 985.6222  | 985.7888  | 1019.0956 |
| 1020.8691 | 1025.4916 | 1025.5367 |
| 1026.4604 | 1026.9124 | 1027.4844 |
| 1027.8611 | 1033.1692 | 1033.3383 |
| 1034.4851 | 1034.9043 | 1040.3623 |
| 1042.2626 | 1056.8362 | 1058.0041 |
| 1076.1489 | 1076.1503 | 1076.4872 |
| 1076.4880 | 1079.1808 | 1081.1257 |
| 1081.5049 | 1084.0070 | 1085.2509 |
| 1085.3188 | 1090.3733 | 1091.1401 |
| 1149.2832 | 1149.3691 | 1149.7870 |
| 1149.8626 | 1149.8851 | 1149.8931 |
| 1150.0590 | 1150.0615 | 1150.1318 |
| 1150.6891 | 1151.0503 | 1151.1539 |
| 1151.4479 | 1151.7991 | 1156.5221 |
| 1156.6298 | 1160.0093 | 1160.4777 |
| 1167.2784 | 1168.5423 | 1168.7236 |
| 1169.8229 | 1170.5499 | 1171.1274 |
| 1172.0251 | 1172.4802 | 1174.2337 |
| 1174.2346 | 1175.2112 | 1175.2818 |
| 1186.8468 | 1186.9067 | 1250.7053 |
| 1251.5303 | 1253.6581 | 1254.4261 |
| 1270.6180 | 1271.9429 | 1289.2083 |
| 1291.0825 | 1291.2564 | 1291.3450 |
| 1291.5256 | 1292.3599 | 1300.8901 |
| 1300.9012 | 1305.7920 | 1305.8656 |
| 1310.0140 | 1310.8069 | 1331.4192 |
| 1336.6414 | 1349.2117 | 1349.2139 |
| 1349.2538 | 1349.2555 | 1355.0184 |
| 1355.0427 | 1355.9656 | 1355.9844 |
| 1358.7428 | 1358.8968 | 1360.8865 |
| 1361.6315 | 1378.6350 | 1379.4431 |
| 1387.9638 | 1388.1568 | 1414.6909 |
| 1415.8334 | 1422.4296 | 1423.7852 |
| 1432.9587 | 1433.2291 | 1435.9105 |
| 1435.9918 | 1437.3253 | 1437.3308 |
| 1437.4416 | 1437.4442 | 1439.6845 |
| 1439.8378 | 1440.7306 | 1440.8953 |
| 1465.2559 | 1465.7764 | 1467.3287 |
| 1467.3512 | 1477.6065 | 1477.6651 |
| 1492.4784 | 1492.6400 | 1493.9970 |
| 1494.8153 | 1495.5719 | 1495.7800 |
| 1502.0997 | 1503.3530 | 1520.7500 |
| 1520.7762 | 1523.1363 | 1523.4026 |
| 1557.5489 | 1558.3937 | 1570.7855 |
| 1570.7856 | 1570.8762 | 1570.8766 |

|           |           |           |
|-----------|-----------|-----------|
| 1576.7663 | 1576.7684 | 1577.0606 |
| 1577.2190 | 1579.5141 | 1580.2375 |
| 1580.6424 | 1581.3392 | 1604.8334 |
| 1605.0610 | 1605.7147 | 1605.7688 |
| 1606.1862 | 1606.4566 | 1606.6068 |
| 1606.6312 | 1606.8063 | 1606.8261 |
| 1607.5815 | 1607.5855 | 2221.5566 |
| 2221.6161 | 2222.7361 | 2222.7495 |
| 3111.4371 | 3112.6880 | 3116.4717 |
| 3116.4733 | 3116.8371 | 3116.8436 |
| 3120.4894 | 3120.4918 | 3120.7503 |
| 3120.7529 | 3120.9010 | 3120.9421 |
| 3124.1329 | 3124.2087 | 3125.1481 |
| 3125.1503 | 3125.9331 | 3125.9342 |
| 3127.1326 | 3127.1332 | 3127.1601 |
| 3127.1605 | 3128.8872 | 3128.9970 |
| 3133.5934 | 3133.6369 | 3136.7244 |
| 3136.7269 | 3136.9631 | 3136.9653 |
| 3138.5296 | 3138.5302 | 3138.8201 |
| 3138.8525 | 3140.8556 | 3141.0706 |
| 3142.4009 | 3142.4041 | 3142.4688 |
| 3142.4711 | 3145.4650 | 3145.4735 |
| 3148.4259 | 3148.4336 | 3148.6295 |
| 3148.6416 | 3149.7777 | 3150.3898 |
| 3150.5844 | 3150.5881 | 3150.8727 |
| 3150.8798 | 3152.5462 | 3152.7217 |
| 3156.4564 | 3156.4792 | 3164.3149 |
| 3164.3175 | 3165.5563 | 3165.5592 |

WSI<sub>2</sub>Zn-----

|                                              |             |             |                |
|----------------------------------------------|-------------|-------------|----------------|
| Electronic Energy (au):                      |             |             | -5796.73334410 |
| Sum of electronic and zero-point Energies=   |             |             | -5795.500361   |
| Sum of electronic and thermal Energies=      |             |             | -5795.413014   |
| Sum of electronic and thermal Enthalpies=    |             |             | -5795.412070   |
| Sum of electronic and thermal Free Energies= |             |             | -5795.643283   |
| Optimized geometry                           |             |             |                |
| C                                            | 2.32054100  | 1.18664500  | 1.60527800     |
| C                                            | 2.91013200  | 2.48411600  | 1.88404400     |
| C                                            | 2.03838100  | 3.45197900  | 1.33551600     |
| C                                            | 0.96800000  | 2.70264600  | 0.70785200     |
| C                                            | -0.96678000 | 2.70301500  | -0.70830700    |
| C                                            | -2.03687500 | 3.45277000  | -1.33597200    |
| C                                            | -2.90918100 | 2.48522400  | -1.88418500    |
| C                                            | -2.32015800 | 1.18752400  | -1.60530400    |
| N                                            | 1.16888700  | 1.32729500  | 0.91359700     |
| N                                            | 0.00076300  | 3.27815900  | -0.00028900    |
| N                                            | -1.16833800 | 1.32772400  | -0.91381600    |
| C                                            | 2.84995100  | -0.11538600 | 2.02412700     |
| C                                            | 1.98535100  | -1.14490700 | 2.46166700     |
| C                                            | 4.24218500  | -0.36576500 | 1.98942400     |
| C                                            | 2.49624300  | -2.38956400 | 2.84541400     |
| H                                            | 0.91014300  | -0.95684700 | 2.52802200     |
| C                                            | 4.74700300  | -1.61456500 | 2.36875600     |
| H                                            | 4.91957700  | 0.41618900  | 1.63904700     |
| C                                            | 3.87804800  | -2.63006100 | 2.79764600     |
| H                                            | 1.81228400  | -3.17184200 | 3.18724600     |
| H                                            | 5.82437400  | -1.79870800 | 2.32116200     |
| H                                            | 4.27606900  | -3.60461800 | 3.09473200     |
| C                                            | -2.85027700 | -0.11430200 | -2.02390500    |
| C                                            | -1.98630500 | -1.14416800 | -2.46186500    |
| C                                            | -4.24259900 | -0.36409300 | -1.98856800    |
| C                                            | -2.49789600 | -2.38861600 | -2.84537200    |
| H                                            | -0.91105700 | -0.95653200 | -2.52876900    |
| C                                            | -4.74811400 | -1.61268500 | -2.36766000    |
| H                                            | -4.91950100 | 0.41815300  | -1.63789000    |
| C                                            | -3.87977500 | -2.62854500 | -2.79694300    |
| H                                            | -1.81442200 | -3.17117400 | -3.18753100    |
| H                                            | -5.82554000 | -1.79637900 | -2.31957000    |
| H                                            | -4.27833800 | -3.60294100 | -3.09383000    |
| C                                            | -2.17827400 | 4.91038500  | -1.37913700    |
| C                                            | -1.04508100 | 5.75695500  | -1.45759500    |
| C                                            | -3.46193200 | 5.50971000  | -1.35806900    |
| C                                            | -1.19511900 | 7.14694300  | -1.51688600    |
| H                                            | -0.04861100 | 5.31211000  | -1.47029100    |
| C                                            | -3.60540200 | 6.89996100  | -1.41667200    |
| H                                            | -4.34697600 | 4.87419900  | -1.27712400    |
| C                                            | -2.47336400 | 7.72610500  | -1.49897400    |
| H                                            | -0.30541100 | 7.78085600  | -1.57874100    |
| H                                            | -4.60644200 | 7.34137100  | -1.39007400    |
| H                                            | -2.58700000 | 8.81326000  | -1.54735000    |
| C                                            | 2.18051300  | 4.90953200  | 1.37839900     |
| C                                            | 1.04774700  | 5.75668300  | 1.45668800     |
| C                                            | 3.46447200  | 5.50820000  | 1.35719500     |
| C                                            | 1.19848700  | 7.14660800  | 1.51568000     |
| H                                            | 0.05105000  | 5.31234400  | 1.46949300     |
| C                                            | 3.60864600  | 6.89839200  | 1.41549800     |
| H                                            | 4.34918900  | 4.87221400  | 1.27637200     |
| C                                            | 2.47702300  | 7.72512300  | 1.49763100     |
| H                                            | 0.30909900  | 7.78098200  | 1.57740600     |

|    |             |             |             |
|----|-------------|-------------|-------------|
| H  | 4.60991000  | 7.33928800  | 1.38879400  |
| H  | 2.59120300  | 8.81223000  | 1.54577200  |
| C  | 4.05923900  | 2.69783000  | 2.66955100  |
| C  | 5.05745300  | 2.87248100  | 3.37088000  |
| C  | 6.20956500  | 3.07220500  | 4.17748500  |
| C  | 6.92700600  | 1.96275500  | 4.69604700  |
| C  | 6.66352900  | 4.38302000  | 4.47732200  |
| C  | 8.06204000  | 2.16503300  | 5.48631100  |
| C  | 7.79990200  | 4.57106800  | 5.26919300  |
| H  | 6.11073000  | 5.23984700  | 4.08252800  |
| C  | 8.50349100  | 3.46638900  | 5.77622300  |
| H  | 8.60602700  | 1.30159500  | 5.88058600  |
| H  | 9.39154200  | 3.61903900  | 6.39621700  |
| C  | -4.05836400 | 2.69926800  | -2.66949300 |
| C  | -5.05667200 | 2.87409600  | -3.37064400 |
| C  | -6.20888800 | 3.07400500  | -4.17705300 |
| C  | -6.66245800 | 4.38488900  | -4.47717700 |
| C  | -6.92683100 | 1.96465200  | -4.69513400 |
| C  | -7.79893600 | 4.57310300  | -5.26886000 |
| H  | -6.10927600 | 5.24164100  | -4.08275500 |
| C  | -8.06196300 | 2.16709500  | -5.48521300 |
| C  | -8.50301900 | 3.46852200  | -5.77541400 |
| H  | -8.60633900 | 1.30373300  | -5.87911700 |
| H  | -9.39115000 | 3.62130000  | -6.39526200 |
| H  | 6.57757100  | 0.95160300  | 4.46963000  |
| H  | 8.13899300  | 5.58665200  | 5.49392500  |
| H  | -6.57770000 | 0.95344600  | -4.46848700 |
| H  | -8.13771900 | 5.58873900  | -5.49381800 |
| Zn | 0.00000300  | -0.00000100 | -0.00006100 |
| N  | 1.16847100  | -1.32751100 | -0.91378700 |
| C  | 0.96684300  | -2.70279400 | -0.70820900 |
| C  | 2.32030000  | -1.18738300 | -1.60527400 |
| C  | 2.03689600  | -3.45261000 | -1.33586700 |
| N  | -0.00074300 | -3.27787900 | -0.00022000 |
| C  | 2.90923500  | -2.48512700 | -1.88412600 |
| C  | 2.85047600  | 0.11440600  | -2.02388800 |
| C  | 2.17823800  | -4.91023400 | -1.37896500 |
| C  | -0.96803300 | -2.70240100 | 0.70786200  |
| C  | 4.05838200  | -2.69931400 | -2.66944200 |
| C  | 1.98652200  | 1.14439100  | -2.46160900 |
| C  | 4.24282900  | 0.36408400  | -1.98875500 |
| C  | 1.04501300  | -5.75675600 | -1.45743500 |
| C  | 3.46187000  | -5.50960600 | -1.35781600 |
| C  | -2.03837000 | -3.45177600 | 1.33554400  |
| N  | -1.16899100 | -1.32705100 | 0.91361900  |
| C  | 5.05662900  | -2.87434600 | -3.37062800 |
| C  | 2.49816000  | 2.38882600  | -2.84510700 |
| H  | 0.91124300  | 0.95686800  | -2.52832500 |
| C  | 4.74838500  | 1.61265600  | -2.36783900 |
| H  | 4.91971800  | -0.41824500 | -1.63823900 |
| C  | 1.19499600  | -7.14675200 | -1.51665500 |
| H  | 0.04856100  | -5.31186700 | -1.47019300 |
| C  | 3.60528600  | -6.89986700 | -1.41634200 |
| H  | 4.34693600  | -4.87412500 | -1.27687100 |
| C  | -2.91016200 | -2.48395100 | 1.88407100  |
| C  | -2.18043800 | -4.90934100 | 1.37841000  |
| C  | -2.32064900 | -1.18645000 | 1.60531000  |
| C  | 6.20880500  | -3.07440500 | -4.17705900 |
| C  | 3.88006700  | 2.62862800  | -2.79689800 |
| H  | 1.81469100  | 3.17147400  | -3.18706900 |
| H  | 5.82583600  | 1.79625000  | -2.31991500 |



|   |             |             |             |
|---|-------------|-------------|-------------|
| C | 2.47321600  | -7.72596600 | -1.49865300 |
| H | 0.30526200  | -7.78062800 | -1.57851500 |
| H | 4.60630600  | -7.34131700 | -1.38967700 |
| C | -4.05925900 | -2.69777600 | 2.66956100  |
| C | -1.04763700 | -5.75643200 | 1.45681500  |
| C | -3.46436600 | -5.50806700 | 1.35705400  |
| C | -2.85011600 | 0.11554600  | 2.02415900  |
| C | 6.66231400  | -4.38534800 | -4.47702100 |
| C | 6.92676400  | -1.96515100 | -4.69532600 |
| H | 4.27866200  | 3.60301500  | -3.09377100 |
| H | 2.58681200  | -8.81312700 | -1.54697300 |
| C | -5.05743600 | -2.87255900 | 3.37090900  |
| C | -1.19831700 | -7.14636500 | 1.51578800  |
| H | -0.05096400 | -5.31204300 | 1.46973200  |
| C | -3.60847900 | -6.89826800 | 1.41532800  |
| H | -4.34910000 | -4.87212000 | 1.27613900  |
| C | -1.98553600 | 1.14521300  | 2.46140300  |
| C | -4.24239000 | 0.36576600  | 1.98975100  |
| C | 7.79875200  | -4.57371200 | -5.26872500 |
| H | 6.10911800  | -5.24202400 | -4.08245400 |
| C | 8.06185700  | -2.16774300 | -5.48542300 |
| H | 6.57767800  | -0.95390000 | -4.46880900 |
| C | -6.20953600 | -3.07239000 | 4.17750400  |
| C | -2.47682400 | -7.72493900 | 1.49758900  |
| H | -0.30890600 | -7.78069700 | 1.57760900  |
| H | -4.60971700 | -7.33921600 | 1.38850400  |
| C | -2.49649000 | 2.38984700  | 2.84515400  |
| H | -0.91028800 | 0.95729200  | 2.52752200  |
| C | -4.74726400 | 1.61453600  | 2.36909200  |
| H | -4.91976800 | -0.41630600 | 1.63960900  |
| C | 8.50285500  | -3.46922600 | -5.77546100 |
| H | 8.13748900  | -5.58939200 | -5.49355500 |
| H | 8.60624700  | -1.30445600 | -5.87946900 |
| C | -6.92702600 | -1.96300800 | 4.69614900  |
| C | -6.66344200 | -4.38324500 | 4.47724800  |
| H | -2.59096000 | -8.81205300 | 1.54570900  |
| C | -3.87833200 | 2.63017700  | 2.79768700  |
| H | -1.81253800 | 3.17223500  | 3.18674700  |
| H | -5.82467000 | 1.79854000  | 2.32173600  |
| H | 9.39095500  | -3.62212100 | -6.39532400 |
| C | -8.06205400 | -2.16539100 | 5.48639200  |
| H | -6.57763400 | -0.95182400 | 4.46980500  |
| C | -7.79980900 | -4.57140000 | 5.26910300  |
| H | -6.11060700 | -5.24002000 | 4.08239100  |
| H | -4.27639700 | 3.60471700  | 3.09477100  |
| C | -8.50344900 | -3.46678900 | 5.77620900  |
| H | -8.60608200 | -1.30200700 | 5.88072800  |
| H | -8.13885500 | -5.58701500 | 5.49376000  |
| H | -9.39149700 | -3.61952200 | 6.39618700  |

Frequencies (cm<sup>-1</sup>):

|         |         |         |
|---------|---------|---------|
| 6.8342  | 8.1829  | 9.6196  |
| 10.4965 | 10.6331 | 11.3848 |
| 13.5137 | 15.0126 | 18.0901 |
| 19.8135 | 19.8173 | 20.1431 |
| 25.9652 | 26.3413 | 27.3281 |
| 28.1970 | 28.2465 | 29.7427 |
| 32.1864 | 41.3647 | 43.6390 |
| 45.9646 | 48.5286 | 49.8069 |
| 49.9094 | 53.5961 | 54.6895 |
| 54.9437 | 56.3507 | 57.6452 |
| 62.8486 | 63.5737 | 66.9884 |

|          |          |          |
|----------|----------|----------|
| 67.7438  | 71.5712  | 73.1358  |
| 74.1787  | 74.8729  | 77.0236  |
| 78.5287  | 99.1123  | 99.7038  |
| 105.9848 | 109.4982 | 110.0995 |
| 116.5383 | 117.6125 | 119.2071 |
| 132.4688 | 138.5386 | 140.2256 |
| 143.4119 | 145.1979 | 150.0796 |
| 163.0473 | 187.2347 | 190.8637 |
| 193.9399 | 194.6712 | 202.2898 |
| 208.5581 | 208.8833 | 210.1230 |
| 211.8736 | 215.9805 | 218.8134 |
| 226.5699 | 226.8917 | 227.5153 |
| 228.0654 | 229.1294 | 237.6769 |
| 239.4037 | 264.2168 | 264.9809 |
| 286.5773 | 289.7034 | 313.7336 |
| 319.3544 | 333.5456 | 334.5963 |
| 339.2121 | 340.9819 | 355.0770 |
| 355.1561 | 361.6007 | 362.2540 |
| 377.4262 | 377.9179 | 385.5204 |
| 388.2950 | 395.4379 | 395.4454 |
| 395.4598 | 395.4656 | 398.3156 |
| 398.3765 | 399.7929 | 400.9363 |
| 401.5577 | 402.1114 | 402.9708 |
| 403.0786 | 419.9413 | 419.9588 |
| 439.8840 | 442.3491 | 444.6667 |
| 446.1260 | 468.2033 | 468.2559 |
| 479.1060 | 483.0723 | 489.5107 |
| 489.8101 | 497.4083 | 497.5908 |
| 498.2354 | 498.2904 | 503.5227 |
| 503.5695 | 504.1740 | 504.4196 |
| 521.9689 | 522.5200 | 536.3929 |
| 536.4602 | 543.3229 | 543.5223 |
| 571.9384 | 572.4961 | 592.4252 |
| 592.4578 | 596.5928 | 596.7422 |
| 608.4808 | 608.7764 | 608.8313 |
| 609.3125 | 609.5297 | 609.5650 |
| 609.6049 | 609.6647 | 613.2737 |
| 613.2750 | 613.4302 | 613.4323 |
| 641.4231 | 642.4352 | 661.4146 |
| 661.4754 | 664.5833 | 666.3695 |
| 676.1425 | 676.9991 | 678.0587 |
| 678.1664 | 679.6361 | 679.9698 |
| 680.4874 | 680.5115 | 680.5549 |
| 680.6866 | 680.7817 | 683.1449 |
| 683.4142 | 684.0954 | 691.9634 |
| 692.1185 | 696.0443 | 696.8109 |
| 707.3446 | 708.1309 | 711.7720 |
| 712.5022 | 719.8958 | 723.0773 |
| 737.9487 | 738.2835 | 743.0691 |
| 743.0969 | 743.1410 | 743.1504 |
| 758.4467 | 758.5279 | 760.5039 |
| 760.6448 | 760.8165 | 761.4390 |
| 768.2311 | 768.4585 | 793.8914 |
| 794.0630 | 809.6604 | 811.7370 |
| 816.1786 | 816.2389 | 819.2399 |
| 819.7756 | 820.3004 | 822.7662 |
| 822.8088 | 824.8296 | 824.9510 |
| 824.9920 | 825.0435 | 826.8694 |
| 840.3515 | 841.0618 | 872.7082 |
| 872.8001 | 891.5937 | 891.8359 |
| 893.1575 | 893.2547 | 893.3965 |

|           |           |           |
|-----------|-----------|-----------|
| 893.4121  | 893.5232  | 893.5879  |
| 895.8864  | 897.5636  | 898.3770  |
| 901.0185  | 930.6606  | 930.6628  |
| 933.2709  | 933.3063  | 937.6027  |
| 938.0375  | 938.0414  | 938.0470  |
| 938.0569  | 938.5058  | 939.5889  |
| 940.8112  | 954.6951  | 954.6975  |
| 956.0317  | 956.0421  | 962.4655  |
| 962.5461  | 962.5476  | 962.5495  |
| 962.5502  | 962.6735  | 963.3014  |
| 963.6967  | 977.2752  | 977.4880  |
| 978.3464  | 979.3221  | 981.8699  |
| 981.8722  | 981.8823  | 981.8826  |
| 983.1291  | 983.4960  | 983.5617  |
| 983.8032  | 984.8614  | 985.0196  |
| 986.1100  | 986.3868  | 1019.3938 |
| 1020.5891 | 1025.5746 | 1025.6149 |
| 1026.8178 | 1027.1159 | 1027.7343 |
| 1028.2244 | 1033.6310 | 1033.7902 |
| 1033.9808 | 1034.0157 | 1040.4262 |
| 1041.9969 | 1059.6405 | 1060.2634 |
| 1076.4685 | 1076.4703 | 1076.4730 |
| 1076.4751 | 1080.5543 | 1081.1418 |
| 1083.2307 | 1084.2004 | 1085.1724 |
| 1085.2854 | 1091.5696 | 1091.6969 |
| 1149.6751 | 1149.6754 | 1149.6775 |
| 1149.6779 | 1149.8379 | 1149.8437 |
| 1149.8692 | 1149.8768 | 1151.3449 |
| 1151.3894 | 1151.4716 | 1151.7618 |
| 1153.5634 | 1154.1789 | 1159.5059 |
| 1159.8121 | 1164.0370 | 1164.3835 |
| 1168.6900 | 1170.0281 | 1170.5293 |
| 1170.9622 | 1171.5459 | 1172.4843 |
| 1172.4880 | 1173.6529 | 1174.5063 |
| 1174.6860 | 1174.8921 | 1174.9816 |
| 1183.2375 | 1184.0702 | 1253.4420 |
| 1253.5978 | 1254.7515 | 1255.6820 |
| 1278.6541 | 1280.9944 | 1291.0900 |
| 1291.5811 | 1291.6531 | 1291.6554 |
| 1292.0420 | 1295.0023 | 1299.4860 |
| 1299.5621 | 1304.2842 | 1304.3041 |
| 1316.9213 | 1317.3905 | 1334.3245 |
| 1340.8718 | 1349.1224 | 1349.1230 |
| 1349.1343 | 1349.1439 | 1355.4392 |
| 1355.4430 | 1355.7689 | 1355.8348 |
| 1360.0935 | 1360.4757 | 1360.9036 |
| 1362.0974 | 1381.5728 | 1382.0002 |
| 1389.7159 | 1389.7826 | 1419.1132 |
| 1419.8578 | 1426.6451 | 1426.9645 |
| 1435.1854 | 1436.0060 | 1436.2850 |
| 1436.3037 | 1437.3879 | 1437.4577 |
| 1437.5054 | 1437.5201 | 1440.9377 |
| 1441.2431 | 1442.2860 | 1443.3527 |
| 1466.0269 | 1466.4238 | 1469.1094 |
| 1469.1169 | 1474.6415 | 1475.8826 |
| 1493.0410 | 1493.0725 | 1495.2279 |
| 1495.9235 | 1496.2781 | 1496.4161 |
| 1502.5227 | 1504.9580 | 1523.5161 |
| 1523.6541 | 1524.7548 | 1525.5152 |
| 1560.9660 | 1562.1733 | 1570.8591 |
| 1570.8595 | 1570.8601 | 1570.8603 |

|           |           |           |
|-----------|-----------|-----------|
| 1577.1814 | 1577.2570 | 1577.4087 |
| 1577.4391 | 1580.8814 | 1581.2235 |
| 1581.8682 | 1581.9877 | 1605.7358 |
| 1606.0288 | 1606.5326 | 1606.5510 |
| 1606.5955 | 1606.6524 | 1606.8262 |
| 1607.0787 | 1607.1003 | 1607.1145 |
| 1608.0577 | 1608.0604 | 2223.7425 |
| 2223.9800 | 2224.4009 | 2224.4245 |
| 3116.4888 | 3116.4893 | 3116.6990 |
| 3116.7026 | 3120.0161 | 3120.0165 |
| 3120.0215 | 3120.0257 | 3121.5785 |
| 3121.6194 | 3121.6970 | 3121.7017 |
| 3125.5151 | 3125.5187 | 3126.1658 |
| 3126.1688 | 3126.6875 | 3126.6877 |
| 3126.6895 | 3126.6898 | 3128.5074 |
| 3128.5719 | 3128.8174 | 3128.8721 |
| 3136.1972 | 3136.1978 | 3136.2013 |
| 3136.2045 | 3137.0301 | 3137.0756 |
| 3137.3493 | 3137.3844 | 3138.3626 |
| 3138.3632 | 3138.6521 | 3138.6774 |
| 3142.0124 | 3142.0134 | 3142.0143 |
| 3142.0178 | 3145.8020 | 3145.9066 |
| 3145.9358 | 3145.9368 | 3147.9260 |
| 3147.9279 | 3147.9528 | 3147.9691 |
| 3149.1984 | 3149.2045 | 3149.2493 |
| 3149.2562 | 3154.8536 | 3154.8713 |
| 3155.1687 | 3155.2264 | 3163.4925 |
| 3163.4985 | 3164.1310 | 3164.1372 |
